# Supplementary material for: Increased interregional virus exchange and nucleotide diversity outline the expansion of the chikungunya virus ECSA lineage in Brazil
Source: PubMed Central journal article supplement — medRxiv. 2023 Apr 3:2023.03.28.23287733. Preprint. [Version 2] doi: 10.1101/2023.03.28.23287733 (PMC10081416; doi:10.1101/2023.03.28.23287733), 2023-04-03
Supplement: media-1.pdf [file media-1.pdf]

## Supplemental figures legends

**Figure S1. Global phylogeny of CHIKV lineages.** Maximum Likelihood (ML) phylogeny reconstructed using 1,987 CHIKV sequences, including the new genomes and others available on GenBank. New Brazilian genomes are indicated by blue branches in the Brazilian ECSA clade. Numbers are clade ultrafast bootstrap support values.

**Figure S2. Ancestral locations of viruses from the CHIKV ECSA lineage circulating in Brazil.** Maximum Clade Credibility tree reconstructed under a Bayesian phylogeography in discrete space using sequences (total n=471) from Brazil, Paraguay and Haiti. Location probabilities of clades I and II as well as of main early branches estimated to be originated in the Northeast of Brazil are represented by numbers placed near nodes. Location probabilities of other clades were omitted for clarity.

**Figure S3. Transmission network of CHIKV in Brazil.** The network was inferred from the transitions between geographic states from the Bayesian phylogeography under a discrete space model. Arrows indicate directionality and their thickness indicates transition frequencies. Node size was scaled by source hub ratio values estimated for each location. Colors are arbitrary.

Figure S1. Global phylogeny of CHIKV lineages

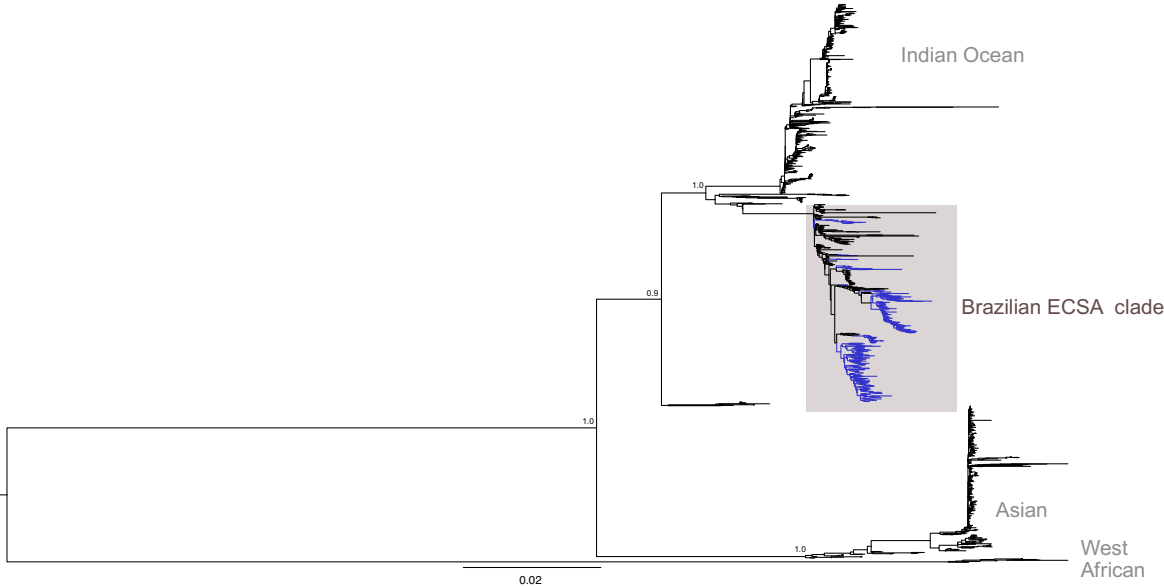

Figure S2. Ancestral locations of viruses from the CHIKV ECSA lineage circulating in Brazil.

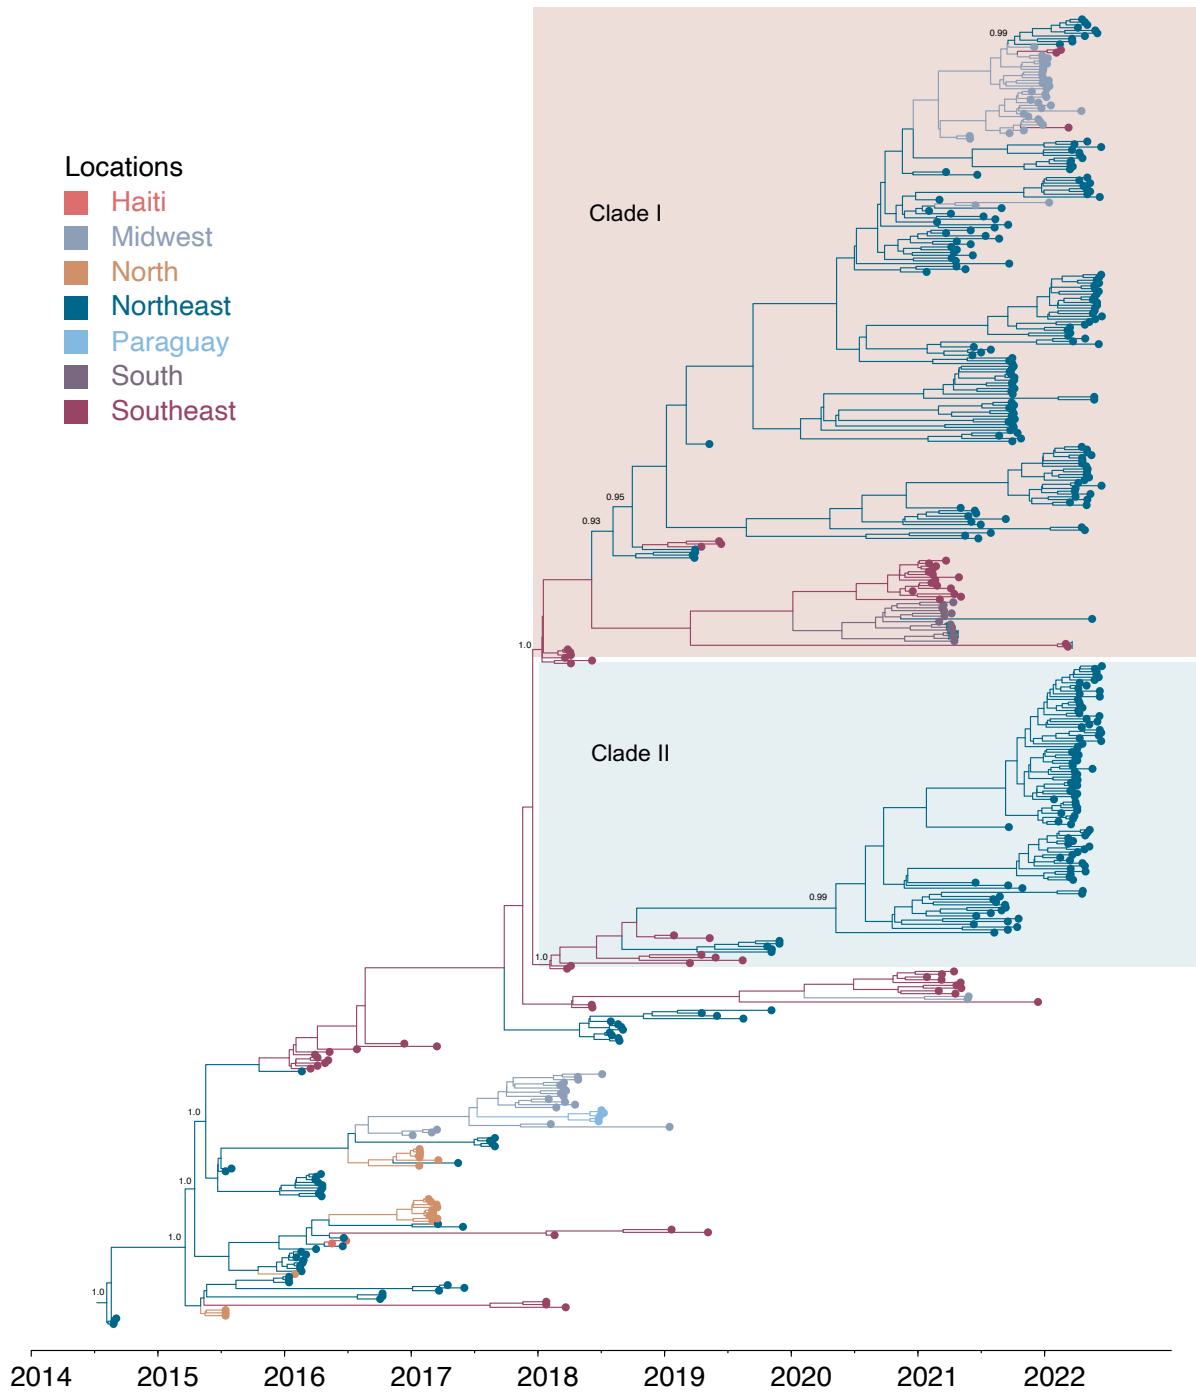

Figure S3. Transmission network of CHIKV in Brazil.

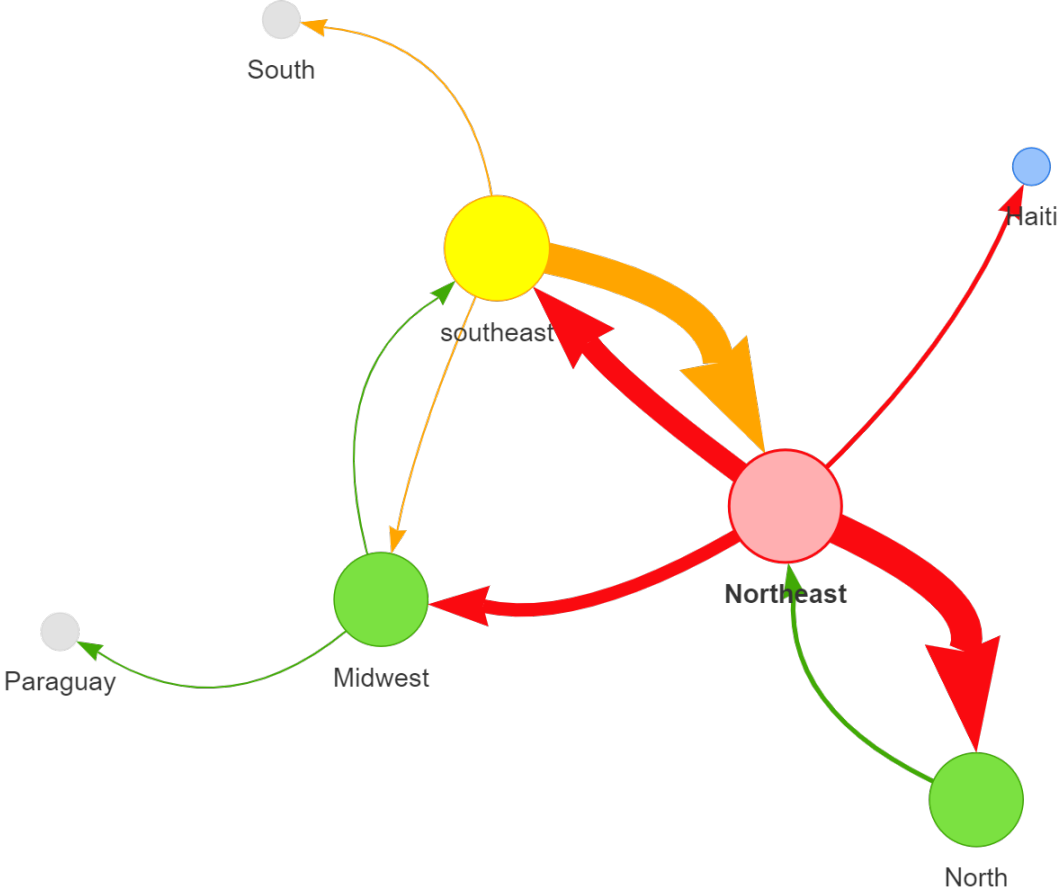

Table S1. Sample information and sequencing statistics.

| ID-sequence                  | Barcode | Lab ID      | Ct    | State | Municipality        | Collection date | Sex | Reads    | Coverage | Depth of Coverage | Identity NT | Identity AA |
|------------------------------|---------|-------------|-------|-------|---------------------|-----------------|-----|----------|----------|-------------------|-------------|-------------|
| CHIKV NB06 ARB02 AL 2021-08  | NB06    | ARB 2       | 21.92 | AL    | BARRA DE SAO MIGUEL | 8-2021          | M   | 8179.0   | 94.3     | 816.7             | 96.8        | 98.3        |
| CHIKV NB07 ARB08 AL 2021-09  | NB07    | ARB 8       | 15.71 | AL    | DELMIRO GOUVEIA     | 9-2021          | F   | 56805.0  | 94.1     | 3498.3            | 96.6        | 98.0        |
| CHIKV NB08 ARB09 AL 2021-10  | NB08    | ARB 9       | 21.92 | AL    | UNIAO DOS PALMARES  | 10-2021         | F   | 3038.0   | 92.9     | 226.8             | 96.8        | 98.3        |
| CHIKV NB02 NIH-01 BA 2019-04 | NB02    | NIH-01/966  | 27.14 | BA    | FEIRA DE SANTANA    | 4-2019          | M   | 132760.0 | 94.5     | 7528.6            | 96.6        | 98.1        |
| CHIKV NB03 NIH-02 BA 2019-06 | NB03    | NIH-02/1435 | 26.52 | BA    | FEIRA DE SANTANA    | 6-2019          | M   | 76168.0  | 94.6     | 5412.9            | 96.7        | 98.3        |
| CHIKV NB04 NIH-03 BA 2019-05 | NB04    | NIH-03/1524 | 18.10 | BA    | FEIRA DE SANTANA    | 5-2019          | F   | 2382.0   | 92.7     | 156.6             | 96.9        | 98.3        |
| CHIKV NB05 NIH-04 BA 2019-08 | NB05    | NIH-04/1801 | 21.32 | BA    | FEIRA DE SANTANA    | 8-2019          | M   | 88238.0  | 94.6     | 6633.4            | 96.6        | 98.3        |
| CHIKV NB09 BA-01 2021-02     | NB09    | BA-01       | 14.80 | BA    | BARREIRAS           | 2-2021          | M   | 28095.0  | 94.3     | 3298.8            | 96.8        | 98.3        |
| CHIKV NB10 BA-02 2021-04     | NB10    | BA-02       | 15.10 | BA    | ITAGUACU DA BAHIA   | 4-2021          | M   | 22200.0  | 94.8     | 2405.0            | 96.8        | 98.3        |
| CHIKV NB11 BA-03 2021-06     | NB11    | BA-03       | 15.90 | BA    | FEIRA DE SANTANA    | 6-2021          | M   | 48701.0  | 94.2     | 8877.8            | 96.8        | 98.3        |
| CHIKV NB12 BA-04 2021-03     | NB12    | BA-04       | 18.30 | BA    | BARREIRAS           | 3-2021          | F   | 72292.0  | 94.1     | 5770.4            | 96.8        | 98.2        |
| CHIKV NB13 BA-05 2021-02     | NB13    | BA-05       | 18.80 | BA    | BARREIRAS           | 2-2021          | F   | 46042.0  | 94.5     | 3880.8            | 96.7        | 98.3        |
| CHIKV NB14 BA-06 2021-09     | NB14    | BA-06       | 19.10 | BA    | SAPEACU             | 9-2021          | F   | 78195.0  | 94.5     | 6739.6            | 96.7        | 98.3        |
| CHIKV NB15 BA-08 2021-03     | NB15    | BA-08       | 20.40 | BA    | BARREIRAS           | 3-2021          | M   | 70997.0  | 94.5     | 6115.9            | 96.8        | 98.3        |
| CHIKV NB16 BA-09 2021-04     | NB16    | BA-09       | 21.00 | BA    | BARREIRAS           | 4-2021          | F   | 97995.0  | 94.4     | 6624.4            | 96.5        | 98.2        |
| CHIKV NB17 BA-10 2021-04     | NB17    | BA-10       | 21.20 | BA    | BARREIRAS           | 4-2021          | F   | 63373.0  | 94.2     | 4977.7            | 96.7        | 98.3        |
| CHIKV NB18 BA-12 2021-04     | NB18    | BA-12       | 22.10 | BA    | IRECE               | 4-2021          | M   | 38035.0  | 94.5     | 3366.7            | 96.6        | 98.2        |
| CHIKV NB19 BA-15 2021-03     | NB19    | BA-15       | 22.80 | BA    | BARREIRAS           | 3-2021          | M   | 68865.0  | 94.2     | 5050.5            | 96.8        | 98.3        |
| CHIKV NB20 BA-18 2021-07     | NB20    | BA-18       | 23.50 | BA    | NOVO TRIUNFO        | 7-2021          | F   | 26719.0  | 94.1     | 2002.1            | 96.7        | 98.3        |
| CHIKV NB21 BA-19 2021-08     | NB21    | BA-19       | 23.50 | BA    | POJUCA              | 8-2021          | F   | 59248.0  | 94.8     | 5119.6            | 96.7        | 98.2        |
| CHIKV NB22 BA-21 2021-03     | NB22    | BA-21       | 23.60 | BA    | BARREIRAS           | 3-2021          | F   | 47638.0  | 94.0     | 3735.6            | 96.7        | 98.2        |
| CHIKV NB23 BA-22 2021-06     | NB23    | BA-22       | 24.20 | BA    | JACOBINA            | 6-2021          | M   | 19873.0  | 94.4     | 1451.0            | 96.8        | 98.3        |
| CHIKV NB24 BA-23 2021-06     | NB24    | BA-23       | 24.30 | BA    | DIAS D'AVILA        | 6-2021          | F   | 123707.0 | 93.8     | 9189.9            | 96.7        | 98.2        |
| CHIKV NB25 BA-24 2021-04     | NB25    | BA-24       | 24.50 | BA    | JOAO DOURADO        | 4-2021          | F   | 71258.0  | 93.4     | 4504.9            | 96.7        | 98.2        |
| CHIKV NB26 BA-25 2021-04     | NB26    | BA-25       | 24.60 | BA    | JUSSARA             | 4-2021          | F   | 148156.0 | 95.0     | 8193.5            | 96.5        | 98.2        |
| CHIKV NB27 BA-26 2021-07     | NB27    | BA-26       | 24.80 | BA    | POJUCA              | 7-2021          | M   | 48203.0  | 94.0     | 3785.6            | 96.7        | 98.3        |
| CHIKV NB28 BA-27 2021-06     | NB28    | BA-27       | 24.80 | BA    | POJUCA              | 6-2021          | F   | 57357.0  | 93.9     | 3934.6            | 96.7        | 98.3        |
| CHIKV NB29 BA-28 2021-04     | NB29    | BA-28       | 25.30 | BA    | PRESIDENTE DUTRA    | 4-2021          | M   | 71019.0  | 94.1     | 5176.7            | 96.8        | 98.3        |
| CHIKV NB30 BA-29 2021-01     | NB30    | BA-29       | 25.40 | BA    | CENTRAL             | 1-2021          | F   | 66279.0  | 94.6     | 4807.5            | 96.7        | 98.2        |
| CHIKV NB31 BA-30 2021-07     | NB31    | BA-30       | 25.50 | BA    | POJUCA              | 7-2021          | M   | 105284.0 | 94.2     | 6852.0            | 96.7        | 98.3        |
| CHIKV NB32 BA-31 2021-09     | NB32    | BA-31       | 26.10 | BA    | POJUCA              | 9-2021          | F   | 92431.0  | 94.1     | 6306.1            | 96.7        | 98.2        |

|                          |      |       |       |    |                      |         |   |          |      |        |      |      |
|--------------------------|------|-------|-------|----|----------------------|---------|---|----------|------|--------|------|------|
| CHIKV NB33 BA-32 2021-04 | NB33 | BA-32 | 26.40 | BA | JOAO DOURADO         | 4-2021  | M | 115503.0 | 93.0 | 8249.5 | 96.6 | 98.1 |
| CHIKV NB34 BA-33 2021-05 | NB34 | BA-33 | 26.60 | BA | JUSSARA              | 5-2021  | M | 50837.0  | 94.0 | 3464.2 | 96.6 | 98.0 |
| CHIKV NB35 BA-34 2021-06 | NB35 | BA-34 | 27.30 | BA | CAFARNAUM            | 6-2021  | F | 16176.0  | 92.8 | 1076.4 | 96.8 | 98.2 |
| CHIKV NB36 BA-35 2021-06 | NB36 | BA-35 | 28.70 | BA | JACOBINA             | 6-2021  | M | 35263.0  | 94.1 | 2821.5 | 96.7 | 98.3 |
| CHIKV BC57 GO057 2021-11 | BC57 | GO057 | 21.00 | GO | APARECIDA DE GOIANIA | 11-2021 | F | 66676.0  | 94.0 | 4996.5 | 96.8 | 98.2 |
| CHIKV BC58 GO058 2022-01 | BC58 | GO058 | 19.00 | GO | GOIANIA              | 1-2022  | F | 9390.0   | 94.4 | 847.3  | 96.7 | 98.3 |
| CHIKV BC59 GO059 2021-12 | BC59 | GO059 | 28.00 | GO | APARECIDA DE GOIANIA | 12-2021 | F | 56752.0  | 94.3 | 3701.0 | 96.7 | 98.2 |
| CHIKV BC60 GO060 2021-12 | BC60 | GO060 | 16.00 | GO | TRINDADE             | 12-2021 | F | 8140.0   | 94.4 | 712.4  | 96.7 | 98.2 |
| CHIKV BC61 GO061 2021-12 | BC61 | GO061 | 27.00 | GO | CAMPOS BELOS         | 12-2021 | M | 87432.0  | 94.2 | 5213.7 | 96.7 | 98.1 |
| CHIKV BC62 GO062 2021-12 | BC62 | GO062 | 19.00 | GO | APARECIDA DE GOIANIA | 12-2021 | F | 16831.0  | 94.3 | 1210.7 | 96.7 | 98.2 |
| CHIKV BC63 GO063 2021-12 | BC63 | GO063 | 21.00 | GO | GOIANIA              | 12-2021 | M | 116669.0 | 94.7 | 6980.6 | 96.6 | 98.1 |
| CHIKV BC64 GO064 2021-12 | BC64 | GO064 | 25.00 | GO | SENADOR CANEDO       | 12-2021 | F | 85084.0  | 94.5 | 5579.4 | 96.6 | 98.2 |
| CHIKV BC65 GO065 2021-12 | BC65 | GO065 | 30.00 | GO | LUZIANIA             | 12-2021 | F | 88300.0  | 94.4 | 5617.1 | 96.8 | 98.3 |
| CHIKV BC66 GO066 2021-12 | BC66 | GO066 | 23.00 | GO | LUZIANIA             | 12-2021 | F | 71421.0  | 94.5 | 4738.0 | 96.7 | 98.2 |
| CHIKV BC67 GO067 2021-12 | BC67 | GO067 | 16.00 | GO | LUZIANIA             | 12-2021 | F | 26270.0  | 94.0 | 2688.4 | 96.8 | 98.3 |
| CHIKV BC68 GO068 2021-12 | BC68 | GO068 | 25.00 | GO | LUZIANIA             | 12-2021 | F | 77257.0  | 94.2 | 5221.2 | 96.8 | 98.3 |
| CHIKV BC69 GO069 2021-12 | BC69 | GO069 | 25.00 | GO | LUZIANIA             | 12-2021 | M | 94412.0  | 94.4 | 6117.0 | 96.7 | 98.2 |
| CHIKV BC70 GO070 2021-12 | BC70 | GO070 | 28.00 | GO | LUZIANIA             | 12-2021 | M | 69718.0  | 94.8 | 3954.7 | 96.6 | 98.3 |
| CHIKV BC71 GO071 2021-12 | BC71 | GO071 | 24.00 | GO | LUZIANIA             | 12-2021 | F | 59435.0  | 94.4 | 4089.1 | 96.7 | 98.2 |
| CHIKV BC72 GO072 2021-12 | BC72 | GO072 | 20.00 | GO | VALPARAISO DE GOIAS  | 12-2021 | F | 7384.0   | 94.3 | 609.2  | 96.8 | 98.3 |
| CHIKV BC73 GO073 2021-12 | BC73 | GO073 | 18.00 | GO | LUZIANIA             | 12-2021 | M | 9418.0   | 93.8 | 842.8  | 96.8 | 98.3 |
| CHIKV BC74 GO074 2021-12 | BC74 | GO074 | 22.00 | GO | LUZIANIA             | 12-2021 | F | 75784.0  | 94.7 | 5741.0 | 96.6 | 98.2 |
| CHIKV BC75 GO075 2021-12 | BC75 | GO075 | 26.00 | GO | LUZIANIA             | 12-2021 | M | 31300.0  | 93.0 | 1737.9 | 96.7 | 98.1 |
| CHIKV BC76 GO076 2022-01 | BC76 | GO076 | 18.00 | GO | APARECIDA DE GOIANIA | 1-2022  | F | 13157.0  | 94.4 | 1106.1 | 96.8 | 98.2 |
| CHIKV BC77 GO077 2022-01 | BC77 | GO077 | 26.00 | GO | LUZIANIA             | 1-2022  | F | 81286.0  | 94.1 | 5318.7 | 96.7 | 98.3 |
| CHIKV BC78 GO078 2022-01 | BC78 | GO078 | 18.00 | GO | LUZIANIA             | 1-2022  | M | 69981.0  | 94.5 | 6072.8 | 96.7 | 98.2 |
| CHIKV BC79 GO079 2022-01 | BC79 | GO079 | 11.00 | GO | APARECIDA DE GOIANIA | 1-2022  | F | 3377.0   | 94.3 | 344.5  | 96.8 | 98.3 |
| CHIKV BC80 GO080 2022-01 | BC80 | GO080 | 21.00 | GO | LUZIANIA             | 1-2022  | F | 2989.0   | 94.7 | 233.5  | 96.6 | 98.1 |
| CHIKV BC81 GO081 2022-01 | BC81 | GO081 | 25.00 | GO | LUZIANIA             | 1-2022  | F | 91383.0  | 94.9 | 6165.5 | 96.5 | 98.2 |
| CHIKV BC82 GO082 2022-01 | BC82 | GO082 | 17.00 | GO | CAMPOS BELOS         | 1-2022  | F | 48503.0  | 94.5 | 4618.1 | 96.7 | 98.1 |
| CHIKV BC83 GO083 2022-01 | BC83 | GO083 | 23.00 | GO | GOIANIA              | 1-2022  | F | 116617.0 | 94.0 | 8253.4 | 96.8 | 98.2 |
| CHIKV BC84 GO084 2022-01 | BC84 | GO084 | 25.00 | GO | LUZIANIA             | 1-2022  | M | 91278.0  | 94.1 | 6363.5 | 96.7 | 98.3 |
| CHIKV BC85 GO085 2021-05 | BC85 | GO085 | 21.00 | GO | PEROLANDIA           | 5-2021  | F | 96788.0  | 94.6 | 6721.9 | 96.6 | 98.2 |

|                          |      |       |       |         |                      |         |   |          |      |        |      |      |
|--------------------------|------|-------|-------|---------|----------------------|---------|---|----------|------|--------|------|------|
| CHIKV BC86 GO086 2021-05 | BC86 | GO086 | 25.00 | GO      | PEROLANDIA           | 5-2021  | M | 109908.0 | 93.9 | 7608.2 | 96.8 | 98.3 |
| CHIKV BC87 GO087 2021-05 | BC87 | GO087 | 26.00 | GO      | BOM JESUS DE GOIAS   | 5-2021  | F | 65882.0  | 94.5 | 4546.6 | 96.8 | 98.2 |
| CHIKV BC88 GO088 2021-05 | BC88 | GO088 | 28.00 | GO      | BOM JESUS DE GOIAS   | 5-2021  | F | 19663.0  | 94.4 | 1358.4 | 96.7 | 98.2 |
| CHIKV BC89 GO089 2021-06 | BC89 | GO089 | 18.00 | GO      | ANAPOLIS             | 6-2021  | F | 27680.0  | 94.1 | 2883.4 | 96.7 | 98.3 |
| CHIKV BC90 GO090 2021-09 | BC90 | GO090 | 28.00 | GO      | APARECIDA DE GOIANIA | 9-2021  | F | 70631.0  | 94.1 | 4804.8 | 96.7 | 98.2 |
| CHIKV BC91 GO091 2021-11 | BC91 | GO091 | 21.00 | GO      | APARECIDA DE GOIANIA | 11-2021 | F | 96503.0  | 94.3 | 6692.1 | 96.6 | 98.2 |
| CHIKV BC92 GO092 2021-11 | BC92 | GO092 | 24.00 | GO      | APARECIDA DE GOIANIA | 11-2021 | M | 84959.0  | 94.0 | 6206.1 | 96.7 | 98.3 |
| CHIKV BC93 GO093 2021-11 | BC93 | GO093 | 24.00 | GO      | GOIANIA              | 11-2021 | F | 18253.0  | 94.2 | 1313.6 | 96.8 | 98.2 |
| CHIKV BC94 GO094 2021-11 | BC94 | GO094 | 23.00 | GO      | GOIANIA              | 11-2021 | M | 79545.0  | 94.2 | 5825.6 | 96.8 | 98.2 |
| CHIKV BC95 GO095 2022-01 | BC95 | GO095 | 22.00 | GO      | TRINDADE             | 1-2022  | F | 29295.0  | 94.3 | 1791.4 | 96.8 | 98.2 |
| CHIKV BC96 GO096 2021-12 | BC96 | GO096 | 22.00 | GO      | GOIANIA              | 12-2021 | M | 725.0    | 93.9 | 58.1   | 96.8 | 98.3 |
| CHIKV MA BC01 2022-06    | BC01 | -     | 22.00 | MA      | SAO LUIS             | 6-2022  | F | 15380    | 92.6 | 964.7  | 96.6 | 98.1 |
| CHIKV MA BC02 2022-06    | BC02 | -     | 24.00 | MA      | SAO LUIS             | 6-2022  | F | 15713    | 88.8 | 1061.1 | 96.7 | 98   |
| CHIKV MA BC03 2022-06    | BC03 | -     | 23.00 | MA      | SAO LUIS             | 6-2022  | M | 9121     | 90.9 | 590    | 96.8 | 98.2 |
| CHIKV MA BC04 2022-06    | BC04 | -     | 26.00 | MA      | SAO LUIS             | 6-2022  | F | 17624    | 82.8 | 1306   | 96.7 | 98.1 |
| CHIKV MA BC05 2022-05    | BC05 | -     | 24.00 | MA      | SAO LUIS             | 5-2022  | M | 16780    | 87.8 | 1125.5 | 96.8 | 98.1 |
| CHIKV MA BC19 2022-06    | BC19 | -     | 22.00 | MA      | BACABAL              | 6-2022  | F | 24423    | 90.7 | 1658.1 | 96.7 | 98.3 |
| CHIKV MA BC20 2022-06    | BC20 | -     | 22.00 | MA      | CAXIAS               | 6-2022  | F | 26619    | 87.8 | 1867.7 | 96.5 | 97.8 |
| CHIKV MA BC21 2022-06    | BC21 | -     | 23.00 | MA      | CAXIAS               | 6-2022  | M | 18226    | 86.9 | 1172.8 | 96.5 | 97.8 |
| CHIKV MA BC22 2022-06    | BC22 | -     | 25.00 | MA      | SAO LUIS             | 6-2022  | F | 16062    | 84.7 | 1134.6 | 96.7 | 98   |
| CHIKV MA BC23 2022-05    | BC23 | -     | 24.00 | MA      | SAO LUIS             | 5-2022  | M | 18760    | 88.5 | 1365.7 | 96.7 | 98   |
| CHIKV MA BC24 2022-05    | BC24 | -     | 24.00 | MA      | SAO LUIS             | 5-2022  | F | 9620     | 81.2 | 781.5  | 96.6 | 98.1 |
| CHIKV MA BC25 2022-06    | BC25 | -     | 24.00 | MA      | SAO LUIS             | 6-2022  | M | 17308    | 87.4 | 1304.8 | 96.7 | 98.1 |
| CHIKV MA BC26 2022-06    | BC26 | -     | 23.00 | MA      | SAO LUIS             | 6-2022  | F | 24030    | 93.2 | 1545.8 | 96.7 | 98.2 |
| CHIKV MA BC40 2022-06    | BC40 | -     | 25.00 | MA      | SAO LUIS             | 6-2022  | F | 17687    | 85.6 | 1227.8 | 96.7 | 98.1 |
| CHIKV MA BC41 2022-06    | BC41 | -     | 24.00 | MA      | SAO LUIS             | 6-2022  | F | 31300    | 87.6 | 1940.4 | 96.7 | 98.1 |
| CHIKV MA BC42 2022-06    | BC42 | -     | 22.00 | MA (SP) | CAJAMAR              | 6-2022  | M | 27099    | 86.5 | 1959.9 | 96.8 | 98.3 |
| CHIKV MA BC43 2022-06    | BC43 | -     | 25.00 | MA      | SAO LUIS             | 6-2022  | M | 33729    | 85.3 | 2364.5 | 96.7 | 98.1 |
| CHIKV MA BC44 2022-06    | BC44 | -     | 24.00 | MA      | SANTA INES           | 6-2022  | F | 18897    | 85.5 | 1250.6 | 96.5 | 98.1 |
| CHIKV MA BC49 2022-05    | BC49 | -     | 22.00 | MA      | SAO LUIS             | 5-2022  | F | 17094    | 89.4 | 1078.1 | 96.7 | 98.1 |
| CHIKV MA BC50 2022-05    | BC50 | -     | 21.00 | MA      | TIMON                | 5-2022  | M | 12600    | 91.5 | 821    | 96.8 | 98.2 |
| CHIKV MA BC51 2022-06    | BC51 | -     | 24.00 | MA      | SAO LUIS             | 6-2022  | M | 11100    | 83   | 756.4  | 96.7 | 98.1 |
| CHIKV MA BC52 2022-05    | BC52 | -     | 21.00 | MA (MG) | SANTA JULIANA        | 5-2022  | M | 12248    | 90.2 | 822.3  | 96.6 | 98   |

|                              |       |       |       |         |              |        |   |        |      |        |      |      |
|------------------------------|-------|-------|-------|---------|--------------|--------|---|--------|------|--------|------|------|
| CHIKV MA BC53 2022-05        | BC53  | -     | 24.00 | MA      | SAO LUIS     | 5-2022 | M | 20722  | 85.5 | 1336.9 | 96.5 | 97.9 |
| CHIKV MA BC54 2022-05        | BC54  | -     | 27.00 | MA      | SAO LUIS     | 5-2022 | M | 9404   | 84.8 | 664.6  | 96.4 | 97.8 |
| CHIKV MA BC55 2022-05        | BC55  | -     | 21.00 | MA      | SAO LUIS     | 5-2022 | M | 14551  | 92.6 | 944.8  | 96.8 | 98.3 |
| CHIKV MA BC56 2022-05        | BC56  | -     | 24.00 | MA      | SAO LUIS     | 5-2022 | F | 13439  | 87.4 | 955.4  | 96.7 | 98   |
| CHIKV MA BC57 2022-05        | BC57  | -     | 24.00 | MA      | SAO LUIS     | 5-2022 | F | 12884  | 86.8 | 862.1  | 96.8 | 98.1 |
| CHIKV MA BC58 2022-05        | BC58  | -     | 26.00 | MA (RR) | BOA VISTA    | 5-2022 | F | 16879  | 88.3 | 1117.1 | 96.5 | 98.1 |
| CHIKV MA BC59 2022-05        | BC59  | -     | 23.00 | MA (PA) | BELEM        | 5-2022 | M | 13390  | 87.3 | 885.8  | 96.7 | 98.1 |
| CHIKV MA BC69 2022-05        | BC69  | -     | 23.00 | MA      | SAO LUIS     | 5-2022 | M | 13059  | 89.8 | 846.9  | 96.7 | 98.2 |
| CHIKV MA BC70 2022-05        | BC70  | -     | 26.00 | MA      | SAO LUIS     | 5-2022 | F | 9868   | 85.1 | 664.1  | 96.7 | 98   |
| CHIKV MA BC71 2022-05        | BC71  | -     | 25.00 | MA      | SAO LUIS     | 5-2022 | F | 13689  | 88   | 898.7  | 96.6 | 98   |
| CHIKV MA BC72 2022-05        | BC72  | -     | 20.00 | MA      | SAO LUIS     | 5-2022 | M | 11537  | 92.6 | 766.9  | 96.8 | 98.2 |
| CHIKV MA BC73 2022-05        | BC73  | -     | 20.00 | MA      | SAO LUIS     | 5-2022 | F | 15871  | 93.1 | 1042.7 | 96.8 | 98.3 |
| CHIKV MA BC74 2022-05        | BC74  | -     | 27.00 | MA      | SAO LUIS     | 5-2022 | F | 17914  | 77.7 | 1472.4 | 96.6 | 97.9 |
| CHIKV MA BC75 2022-05        | BC75  | -     | 25.00 | MA      | SAO LUIS     | 5-2022 | M | 18346  | 85.7 | 1212.6 | 96.6 | 97.9 |
| CHIKV MA BC76 2022-05        | BC76  | -     | 23.00 | MA      | SAO LUIS     | 5-2022 | F | 31268  | 84.7 | 2207.1 | 96.5 | 97.9 |
| CHIKV MA BC89 2022-05        | BC89  | -     | 20.00 | MA      | SAO LUIS     | 5-2022 | M | 22535  | 92.8 | 1488.8 | 96.7 | 98.1 |
| CHIKV MS BC11 2022-04        | BC11  | -     | 18.00 | MS      | CAMPO GRANDE | 4-2022 | F | 27643  | 94.1 | 1657   | -    | -    |
| CHIKV MS BC12 2022-04        | BC12  | -     | 27.00 | MS      | CAMPO GRANDE | 4-2022 | M | 48153  | 94.3 | 2699.4 | -    | -    |
| CHIKV PB PB017 NBC17 2021-05 | NBC17 | PB017 | 27.00 | PB      | REMIGIO      | 5-2021 | M | 172377 | 94.2 | 9450.2 | 96.9 | 98.4 |
| CHIKV PB PB018 NBC18 2021-06 | NBC18 | PB018 | 21.00 | PB      | CAPIM        | 6-2021 | F | 108135 | 94.1 | 6318   | 96.9 | 98.3 |
| CHIKV PB PB019 NBC19 2021-07 | NBC19 | PB019 | 18.00 | PB      | JOAO PESSOA  | 7-2021 | M | -1600  | 91.6 | 170    | 96.8 | 98.3 |
| CHIKV PB PB020 NBC20 2021-06 | NBC20 | PB020 | 16.00 | PB      | JOAO PESSOA  | 6-2021 | M | 57899  | 94   | 4989.4 | 96.9 | 98.4 |
| CHIKV PB PB021 NBC21 2021-06 | NBC21 | PB021 | 20.00 | PB      | JOAO PESSOA  | 6-2021 | F | 65560  | 94   | 4074.3 | 96.8 | 98.4 |
| CHIKV PB PB022 NBC22 2021-05 | NBC22 | PB022 | 18.00 | PB      | JOAO PESSOA  | 5-2021 | F | 23352  | 93.9 | 1688.4 | 96.8 | 98.4 |
| CHIKV PB PB023 NBC23 2021-06 | NBC23 | PB023 | 28.00 | PB      | JOAO PESSOA  | 6-2021 | M | 138786 | 94.1 | 7473.3 | 96.9 | 98.4 |
| CHIKV PB PB024 NBC24 2021-06 | NBC24 | PB024 | 18.00 | PB      | SUME         | 6-2021 | M | 69942  | 94.3 | 5616.9 | 96.6 | 98.2 |
| CHIKV PB PB025 NBC25 2021-05 | NBC25 | PB025 | 15.00 | PB      | CONDE        | 5-2021 | F | 53626  | 94.3 | 4135.1 | 96.8 | 98.3 |
| CHIKV PB PB026 NBC26 2021-06 | NBC26 | PB026 | 20.00 | PB      | CAAPORA      | 6-2021 | F | 109771 | 94.5 | 6857.6 | 96.8 | 98.3 |
| CHIKV PB PB027 NBC27 2021-06 | NBC27 | PB027 | 17.00 | PB      | JOAO PESSOA  | 6-2021 | F | 61673  | 94   | 4704   | 96.8 | 98.4 |
| CHIKV PB PB028 NBC28 2021-07 | NBC28 | PB028 | 22.00 | PB      | LUCENA       | 7-2021 | F | 51416  | 94.3 | 3498.7 | 96.8 | 98.2 |
| CHIKV PB PB029 NBC29 2021-08 | NBC29 | PB029 | 14.00 | PB      | JOAO PESSOA  | 8-2021 | M | 10559  | 93.8 | 911.9  | 96.8 | 98.3 |
| CHIKV SP PB030 NBC30 2021-07 | NBC30 | PB030 | 23.00 | PB (SP) | SAO PAULO    | 7-2021 | M | 93533  | 93.8 | 5672.5 | 96.8 | 98.4 |



|                              |       |       |       |    |                         |         |   |         |      |          |      |      |
|------------------------------|-------|-------|-------|----|-------------------------|---------|---|---------|------|----------|------|------|
| CHIKV PB PB031 NBC31 2021-08 | NBC31 | PB031 | 25.00 | PB | JOAO PESSOA             | 8-2021  | M | 87700   | 93.9 | 5246.2   | 96.7 | 98.3 |
| CHIKV PB PB032 NBC32 2021-08 | NBC32 | PB032 | 18.00 | PB | CONDE                   | 8-2021  | M | 53784   | 93.9 | 3875.3   | 96.8 | 98.4 |
| CHIKV PB PB033 NBC33 2021-08 | NBC33 | PB033 | 13.00 | PB | ALAGOINHA               | 8-2021  | M | -1300   | 91.6 | 160      | 96.8 | 98.2 |
| CHIKV PB PB034 NBC34 2021-09 | NBC34 | PB034 | 22.00 | PB | SANTA RITA              | 9-2021  | M | 95964   | 93.9 | 5833.5   | 96.7 | 98.4 |
| CHIKV PB PB035 NBC35 2021-09 | NBC35 | PB035 | 18.00 | PB | JOAO PESSOA             | 9-2021  | M | 22917   | 93.9 | 1625.7   | 96.8 | 98.4 |
| CHIKV PB PB036 NBC36 2021-09 | NBC36 | PB036 | 18.00 | PB | JOAO PESSOA             | 9-2021  | F | 39209   | 94.3 | 3157.3   | 96.8 | 98.2 |
| CHIKV PB PB037 NBC37 2021-08 | NBC37 | PB037 | 20.00 | PB | JOAO PESSOA             | 8-2021  | F | 54302   | 94.1 | 3620.1   | 96.9 | 98.3 |
| CHIKV PB PB038 NBC38 2021-09 | NBC38 | PB038 | 18.00 | PB | CAAPORA                 | 9-2021  | M | 62611   | 94.2 | 4394     | 96.9 | 98.4 |
| CHIKV PB PB039 NBC39 2021-10 | NBC39 | PB039 | 21.00 | PB | ALAGOA GRANDE           | 10-2021 | F | 1361    | 93.7 | 89.9     | 97   | 98.4 |
| CHIKV PE 5572 NBC01 2021-10  | NBC01 | 5572  | 27.62 | PE | BARREIROS               | 10-2021 | F | -2000   | 89   | 200      | 96.7 | 98.1 |
| CHIKV PE 5542 NBC02 2021-10  | NBC02 | 5542  | 28.34 | PE | IPOJUCA                 | 10-2021 | M | 46980   | 94.2 | 3559.7   | 96.9 | 98.4 |
| CHIKV PE 4240 NBC03 2021-08  | NBC03 | 4240  | 27.45 | PE | BARREIROS               | 8-2021  | M | -1700   | 91.1 | 180      | 96.8 | 98.1 |
| CHIKV PE 4258 NBC04 2021-08  | NBC04 | 4258  | 24.87 | PE | GOIANIA                 | 8-2021  | M | 99774   | 93.9 | 6987.5   | 97   | 98.5 |
| CHIKV PE 5439 NBC05 2021-10  | NBC05 | 5439  | 27.87 | PE | BARREIROS               | 10-2021 | M | 68108   | 93.8 | 4425.5   | 96.8 | 98.3 |
| CHIKV PE 5462 NBC06 2021-10  | NBC06 | 5462  | 25.05 | PE | SOURE                   | 10-2021 | F | 64105   | 94.3 | 5166.8   | 96.8 | 98.3 |
| CHIKV PE 5464 NBC07 2021-10  | NBC07 | 5464  | 22.08 | PE | FERNANDO DE NORONHA     | 10-2021 | F | 18131   | 93.8 | 1739.8   | 96.8 | 98.3 |
| CHIKV PE 5313 NBC08 2021-10  | NBC08 | 5313  | 26.46 | PE | VICENCIA                | 10-2021 | M | 53674   | 93.9 | 3387.5   | 96.9 | 98.4 |
| CHIKV PE 5342 NBC09 2021-09  | NBC09 | 5342  | 27.31 | PE | CONDADO                 | 9-2021  | F | 979     | 89.4 | 70.3     | 97.1 | 98.5 |
| CHIKV PE 5348 NBC10 2021-09  | NBC10 | 5348  | 24.32 | PE | FERNANDO DE NORONHA     | 9-2021  | M | 16364   | 93.8 | 1306.4   | 96.9 | 98.4 |
| CHIKV PE 5375 NBC11 2021-10  | NBC11 | 5375  | 25.04 | PE | AGUA PRETA              | 10-2021 | F | 50206   | 93.9 | 3518.3   | 96.7 | 98.2 |
| CHIKV PE 5118 NBC12 2021-09  | NBC12 | 5118  | 26.31 | PE | PAULISTA                | 9-2021  | F | -400    | 91.3 | 200      | 96.7 | 98.3 |
| CHIKV PE 5126 NBC13 2021-09  | NBC13 | 5126  | 26.31 | PE | BARREIROS               | 9-2021  | F | 43294   | 94.9 | 3159.1   | 96.7 | 98.1 |
| CHIKV PE 5127 NBC14 2021-09  | NBC14 | 5127  | 26.50 | PE | BARREIROS               | 9-2021  | M | 39295   | 93.8 | 2557.8   | 96.8 | 98.3 |
| CHIKV PE 4641 NBC15 2021-08  | NBC15 | 4641  | 25.11 | PE | JABOATAO DOS GUARARAPES | 8-2021  | M | 52875   | 94.1 | 3948.2   | 96.9 | 98.3 |
| CHIKV PE 4664 NBC16 2021-08  | NBC16 | 4664  | 23.02 | PE | FEIRA NOVA              | 8-2021  | F | 38012   | 94.4 | 2653.8   | 96.8 | 98.2 |
| CHIKV PI06 NBC06 2021-07     | NB06  | PI06  | 30.00 | PI | TERESINA                | 7-2021  | M | 1779643 | 93.4 | 129706.9 | 96.6 | 98.1 |
| CHIKV PI07 NBC07 2021-08     | NB07  | PI07  | 30.00 | PI | TERESINA                | 8-2021  | M | 1681440 | 90.8 | 103651.5 | 96.7 | 98   |
| CHIKV PI NB01 2022-02        | NB01  | -     | 25.00 | PI | TERESINA                | 2-2022  | F | 12201   | 92.6 | 786.7    | 96.6 | 97.9 |
| CHIKV PI NB02 2022-01        | NB02  | -     | 26.00 | PI | TERESINA                | 1-2022  | F | 20517   | 94.5 | 1583.2   | 96.5 | 98.1 |
| CHIKV PI NB03 2022-02        | NB03  | -     | 27.00 | PI | TERESINA                | 2-2022  | F | 10368   | 94.6 | 718.5    | 96.6 | 98.2 |
| CHIKV PI NB04 2022-02        | NB04  | -     | 28.00 | PI | TERESINA                | 2-2022  | F | 16232   | 94   | 1110     | 96.6 | 98.2 |
| CHIKV PI NB06 2022-03        | NB06  | -     | 26.00 | PI | TERESINA                | 3-2022  | M | 19842   | 94.1 | 1492.3   | 96.6 | 98.1 |

|                       |      |   |       |    |          |        |   |       |      |        |      |      |
|-----------------------|------|---|-------|----|----------|--------|---|-------|------|--------|------|------|
| CHIKV PI NB07 2022-03 | NB07 | - | 29.00 | PI | TERESINA | 3-2022 | M | 10088 | 94.2 | 649.1  | 96.6 | 98.2 |
| CHIKV PI NB08 2022-03 | NB08 | - | 27.00 | PI | TERESINA | 3-2022 | F | 16292 | 94.3 | 1114.2 | 96.6 | 98.1 |
| CHIKV PI NB09 2022-03 | NB09 | - | 29.00 | PI | TERESINA | 3-2022 | F | 13176 | 94   | 1051.1 | 96.6 | 98.2 |
| CHIKV PI NB10 2022-03 | NB10 | - | 27.00 | PI | TERESINA | 3-2022 | F | 21506 | 94.8 | 1489.1 | 96.7 | 98.2 |
| CHIKV PI NB11 2022-03 | NB11 | - | 29.00 | PI | TERESINA | 3-2022 | M | 13639 | 94   | 1087   | 96.6 | 98.1 |
| CHIKV PI NB12 2022-03 | NB12 | - | 27.00 | PI | TERESINA | 3-2022 | M | 18907 | 94   | 1496.1 | 96.6 | 98.2 |
| CHIKV PI NB13 2022-03 | NB13 | - | 27.00 | PI | TERESINA | 3-2022 | F | 18498 | 95.3 | 1415.6 | 96.3 | 98   |
| CHIKV PI NB14 2022-03 | NB14 | - | 29.00 | PI | TERESINA | 3-2022 | F | 12553 | 93.8 | 894.8  | 96.6 | 98.2 |
| CHIKV PI NB15 2022-03 | NB15 | - | 28.00 | PI | TERESINA | 3-2022 | F | 10043 | 94.5 | 739.8  | 96.6 | 98.1 |
| CHIKV PI NB16 2022-03 | NB16 | - | 20.00 | PI | TERESINA | 3-2022 | F | 13719 | 78.4 | 805.1  | 95.7 | 96.9 |
| CHIKV PI NB17 2022-03 | NB17 | - | 29.00 | PI | TERESINA | 3-2022 | F | 15330 | 94.1 | 1093.2 | 96.6 | 98.2 |
| CHIKV PI NB18 2022-03 | NB18 | - | 27.00 | PI | TERESINA | 3-2022 | M | 12501 | 94.2 | 1060.9 | 96.6 | 98.1 |
| CHIKV PI NB19 2022-03 | NB19 | - | 30.00 | PI | TERESINA | 3-2022 | F | 19575 | 94.2 | 1472.8 | 96.7 | 98.2 |
| CHIKV PI NB20 2022-03 | NB20 | - | 30.00 | PI | TERESINA | 3-2022 | F | 21103 | 94.9 | 1559.4 | 96.5 | 97.9 |
| CHIKV PI NB21 2022-03 | NB21 | - | 29.00 | PI | TERESINA | 3-2022 | F | 22248 | 94.5 | 1511.5 | 96.5 | 98.1 |
| CHIKV PI NB22 2022-03 | NB22 | - | 28.00 | PI | TERESINA | 3-2022 | M | 18295 | 93.9 | 1365.1 | 96.8 | 98.3 |
| CHIKV PI NB23 2022-03 | NB23 | - | 28.00 | PI | TERESINA | 3-2022 | M | 5089  | 94.3 | 373.8  | 96.7 | 98.3 |
| CHIKV PI NB24 2022-03 | NB24 | - | 30.00 | PI | TERESINA | 3-2022 | F | 8309  | 93.6 | 552.9  | 96.4 | 98.1 |
| CHIKV PI NB25 2022-03 | NB25 | - | 28.00 | PI | TERESINA | 3-2022 | F | 9121  | 93.1 | 660.9  | 96.6 | 98.1 |
| CHIKV PI NB26 2022-03 | NB26 | - | 28.00 | PI | TERESINA | 3-2022 | M | 14851 | 94.9 | 1024.1 | 96.4 | 98.1 |
| CHIKV PI NB27 2022-03 | NB27 | - | 26.00 | PI | UNIÃO    | 3-2022 | F | 15621 | 93.9 | 1065.4 | 96.6 | 98.1 |
| CHIKV PI NB28 2022-03 | NB28 | - | 28.00 | PI | TERESINA | 3-2022 | F | 7590  | 94   | 563.8  | 96.6 | 98.2 |
| CHIKV PI NB29 2022-04 | NB29 | - | 29.00 | PI | TERESINA | 4-2022 | M | 11405 | 94   | 835.2  | 96.6 | 98.2 |
| CHIKV PI NB30 2022-04 | NB30 | - | 28.00 | PI | TERESINA | 4-2022 | F | 16892 | 93.3 | 1133   | 96.6 | 98.2 |
| CHIKV PI NB31 2022-04 | NB31 | - | 28.00 | PI | TERESINA | 4-2022 | M | 12862 | 94.1 | 901.1  | 96.6 | 98.2 |
| CHIKV PI NB32 2022-04 | NB32 | - | 26.00 | PI | TERESINA | 4-2022 | M | 16092 | 94.1 | 1224.4 | 96.6 | 98.2 |
| CHIKV PI NB33 2022-03 | NB33 | - | 30.00 | PI | TERESINA | 3-2022 | F | 9678  | 93.3 | 690.7  | 96.6 | 98.1 |
| CHIKV PI NB34 2022-04 | NB34 | - | 29.00 | PI | TERESINA | 4-2022 | F | 5582  | 93.1 | 500.2  | 96.6 | 98.1 |
| CHIKV PI NB35 2022-03 | NB35 | - | 25.00 | PI | TERESINA | 3-2022 | M | 8226  | 92.5 | 622.7  | 96.7 | 98.2 |
| CHIKV PI NB37 2022-03 | NB37 | - | 27.00 | PI | TERESINA | 3-2022 | F | 7864  | 76.2 | 575.1  | 96.4 | 97.7 |
| CHIKV PI NB38 2022-04 | NB38 | - | 28.00 | PI | TERESINA | 4-2022 | F | 8909  | 94.3 | 623.9  | 96.6 | 98.1 |
| CHIKV PI NB39 2022-03 | NB39 | - | 29.00 | PI | TERESINA | 3-2022 | F | 6820  | 94.9 | 502.9  | 96.5 | 98   |
| CHIKV PI NB40 2022-04 | NB40 | - | 30.00 | PI | TERESINA | 4-2022 | M | 6015  | 94.3 | 390.1  | 96.6 | 98   |

|                       |      |   |       |    |                    |        |   |       |      |        |      |      |
|-----------------------|------|---|-------|----|--------------------|--------|---|-------|------|--------|------|------|
| CHIKV PI NB41 2022-04 | NB41 | - | 24.00 | PI | TERESINA           | 4-2022 | F | 5361  | 94.4 | 433.2  | 96.6 | 98.1 |
| CHIKV PI NB42 2022-04 | NB42 | - | 25.00 | PI | TERESINA           | 4-2022 | F | 6416  | 94   | 542.3  | 96.6 | 98.1 |
| CHIKV PI NB43 2022-04 | NB43 | - | 29.00 | PI | TERESINA           | 4-2022 | M | 9979  | 94.3 | 658.6  | 96.6 | 98.1 |
| CHIKV PI NB44 2022-04 | NB44 | - | 30.00 | PI | TERESINA           | 4-2022 | F | 6639  | 94.2 | 420.7  | 96.6 | 98.2 |
| CHIKV PI NB45 2022-04 | NB45 | - | 26.00 | PI | TERESINA           | 4-2022 | M | 10682 | 92.8 | 697.8  | 96.6 | 98.1 |
| CHIKV PI NB46 2022-04 | NB46 | - | 30.00 | PI | TERESINA           | 4-2022 | F | 5700  | 94.4 | 418.9  | 96.6 | 98.1 |
| CHIKV PI NB47 2022-04 | NB47 | - | 28.00 | PI | TERESINA           | 4-2022 | F | 6657  | 94   | 461.9  | 96.6 | 98.2 |
| CHIKV PI NB48 2022-04 | NB48 | - | 28.00 | PI | TERESINA           | 4-2022 | M | 4820  | 93.7 | 343.9  | 96.5 | 98   |
| CHIKV PI NB49 2022-04 | NB49 | - | 27.00 | PI | TERESINA           | 4-2022 | M | 18574 | 92.6 | 1357.4 | 96.6 | 98   |
| CHIKV PI NB50 2022-04 | NB50 | - | 28.00 | PI | TERESINA           | 4-2022 | F | 15671 | 90.5 | 1070.6 | 96.6 | 98   |
| CHIKV PI NB51 2022-04 | NB51 | - | 30.00 | PI | TERESINA           | 4-2022 | M | 14221 | 82.3 | 1047.3 | 96.4 | 97.7 |
| CHIKV PI NB52 2022-04 | NB52 | - | 28.00 | PI | TERESINA           | 4-2022 | F | 26750 | 92.9 | 2036   | 96.6 | 98.2 |
| CHIKV PI NB53 2022-04 | NB53 | - | 30.00 | PI | TERESINA           | 4-2022 | F | 25594 | 90.2 | 1726   | 96.5 | 98   |
| CHIKV PI NB54 2022-04 | NB54 | - | 27.00 | PI | TERESINA           | 4-2022 | F | 15116 | 91.8 | 1156.6 | 96.3 | 97.7 |
| CHIKV PI NB55 2022-04 | NB55 | - | 28.00 | PI | BOQUEIRAO DO PIAUI | 4-2022 | F | 18117 | 91.6 | 1205.1 | 96.4 | 97.8 |
| CHIKV PI NB56 2022-04 | NB56 | - | 27.00 | PI | TERESINA           | 4-2022 | M | 18117 | 91.6 | 1205.1 | 96.4 | 97.8 |
| CHIKV PI NB57 2022-04 | NB57 | - | 26.00 | PI | TERESINA           | 4-2022 | F | 17821 | 92.3 | 1181.9 | 96.5 | 97.9 |
| CHIKV PI NB58 2022-04 | NB58 | - | 25.00 | PI | TERESINA           | 4-2022 | F | 12749 | 91.9 | 990.4  | 96.2 | 97.7 |
| CHIKV PI NB59 2022-04 | NB59 | - | 28.00 | PI | TERESINA           | 4-2022 | M | 24323 | 86.9 | 1725.7 | 96.5 | 97.8 |
| CHIKV PI NB60 2022-04 | NB60 | - | 28.00 | PI | TERESINA           | 4-2022 | M | 20071 | 90.1 | 1482.3 | 96.5 | 97.8 |
| CHIKV PI NB61 2022-04 | NB61 | - | 30.00 | PI | TERESINA           | 4-2022 | M | 22407 | 82.2 | 1565.9 | 96.4 | 97.5 |
| CHIKV PI NB62 2022-04 | NB62 | - | 28.00 | PI | TERESINA           | 4-2022 | M | 21006 | 89.8 | 1422.3 | 96.4 | 97.6 |
| CHIKV PI NB63 2022-04 | NB63 | - | 30.00 | PI | TERESINA           | 4-2022 | F | 15311 | 90.5 | 1148.7 | 96.6 | 98.1 |
| CHIKV PI NB64 2022-04 | NB64 | - | 26.00 | PI | TERESINA           | 4-2022 | F | 16081 | 82.6 | 1143   | 96.2 | 97.7 |
| CHIKV PI NB65 2022-04 | NB65 | - | 27.00 | PI | TERESINA           | 4-2022 | M | 18838 | 90.2 | 1335.7 | 96.3 | 97.7 |
| CHIKV PI NB66 2022-04 | NB66 | - | 29.00 | PI | TERESINA           | 4-2022 | M | 13921 | 86.9 | 1080.3 | 96.5 | 97.9 |
| CHIKV PI NB67 2022-04 | NB67 | - | 29.00 | PI | TERESINA           | 4-2022 | F | 14815 | 90.6 | 1035.5 | 96.6 | 98   |
| CHIKV PI NB68 2022-04 | NB68 | - | 25.00 | PI | TERESINA           | 4-2022 | F | 16313 | 92.8 | 1283.9 | 96.6 | 98   |
| CHIKV PI NB69 2022-04 | NB69 | - | 26.00 | PI | AGRICOLANDIA       | 4-2022 | M | 12919 | 85.2 | 995.4  | 96.4 | 97.9 |
| CHIKV PI NB70 2022-04 | NB70 | - | 30.00 | PI | TERESINA           | 4-2022 | F | 22456 | 88.9 | 1575.6 | 96.6 | 97.8 |
| CHIKV PI NB71 2022-04 | NB71 | - | 25.00 | PI | TERESINA           | 4-2022 | M | 16212 | 90.3 | 1247.5 | 96.5 | 97.9 |
| CHIKV PI NB72 2022-04 | NB72 | - | 27.00 | PI | TERESINA           | 4-2022 | F | 21832 | 90.6 | 1214.2 | 96.6 | 98   |
| CHIKV PI NB73 2022-05 | NB73 | - | 26.00 | PI | TERESINA           | 5-2022 | F | 19482 | 92.2 | 1284   | 96.6 | 98.1 |

|                                   |      |         |       |                        |                      |        |   |        |      |         |      |      |
|-----------------------------------|------|---------|-------|------------------------|----------------------|--------|---|--------|------|---------|------|------|
| CHIKV PI NB74 2022-04             | NB74 | -       | 25.00 | PI                     | TERESINA             | 4-2022 | F | 31171  | 86.5 | 2249.6  | 96.4 | 97.7 |
| CHIKV PI NB75 2022-05             | NB75 | -       | 28.00 | PI                     | TERESINA             | 5-2022 | F | 24562  | 85.3 | 1733.9  | 96.4 | 97.6 |
| CHIKV PI NB76 2022-04             | NB76 | -       | 28.00 | PI                     | TERESINA             | 4-2022 | M | 29219  | 89.5 | 2059.5  | 96.6 | 98.1 |
| CHIKV PI NB77 2022-05             | NB77 | -       | 29.00 | PI                     | TERESINA             | 5-2022 | F | 18968  | 84.3 | 1381.1  | 96.7 | 98.1 |
| CHIKV PI NB78 2022-05             | NB78 | -       | 30.00 | PI                     | TERESINA             | 5-2022 | F | 32919  | 90.2 | 2260.1  | 96.8 | 98.1 |
| CHIKV PI NB79 2022-05             | NB79 | -       | 16.00 | PI                     | TERESINA             | 5-2022 | M | 4406   | 94.2 | 558.5   | 96.6 | 98.2 |
| CHIKV PI NB80 2022-05             | NB80 | -       | 27.00 | PI                     | TERESINA             | 5-2022 | M | 22919  | 91.7 | 1810.6  | 96.6 | 98   |
| CHIKV PI NB81 2022-06             | NB81 | -       | 25.00 | PI                     | PARNAIBA             | 6-2022 | M | 23277  | 89.3 | 1415.7  | 96.6 | 98   |
| CHIKV PI NB82 2022-06             | NB82 | -       | 28.00 | PI                     | ALVORADA DO GURGUEIA | 6-2022 | F | 26009  | 95.2 | 2044.5  | 96.5 | 98   |
| CHIKV PI NB84 2022-06             | NB84 | -       | 28.00 | PI (RIO GRANDE DO SUL) | ELDORADO DO SUL      | 6-2022 | F | 27053  | 88.1 | 1814.4  | 96.5 | 98   |
| CHIKV PI NB85 2022-06             | NB85 | -       | 28.00 | PI                     | TERESINA             | 6-2022 | F | 24702  | 86   | 1847.9  | 96.4 | 97.7 |
| CHIKV PI NB86 2022-06             | NB86 | -       | 23.00 | PI                     | TERESINA             | 6-2022 | M | 17699  | 92.9 | 1273.1  | 96.4 | 97.9 |
| CHIKV PI NB87 2022-06             | NB87 | -       | 28.00 | PI                     | DEMerval LOBÃO       | 6-2022 | F | 17376  | 86.6 | 1222    | 96.4 | 97.8 |
| CHIKV PI NB88 2022-06             | NB88 | -       | 28.00 | PI                     | TERESINA             | 6-2022 | F | 17382  | 86.3 | 1363.8  | 96.4 | 97.7 |
| CHIKV PI NB89 2022-06             | NB89 | -       | 30.00 | PI                     | TERESINA             | 6-2022 | F | 34966  | 85.7 | 2286.7  | 96.5 | 97.8 |
| CHIKV PI NB90 2022-06             | NB90 | -       | 28.00 | PI                     | TERESINA             | 6-2022 | M | 46180  | 85   | 2683.8  | 96.3 | 97.5 |
| CHIKV PI NB91 2022-06             | NB91 | -       | 26.00 | PI                     | TERESINA             | 6-2022 | F | 26429  | 91.9 | 2069.9  | 96.6 | 98.1 |
| CHIKV NBC01 PR199_2096-21 2021-04 | BC1  | 2096/21 | 32.00 | PR                     | APUCARANA            | 4-2021 | M | 151883 | 61.1 | 11994.1 | -    | -    |
| CHIKV NBC02 PR200_2221-21 2021-04 | BC2  | 2221/21 | 28.00 | PR                     | APUCARANA            | 4-2021 | M | 160235 | 69.1 | 39235.6 | -    | -    |
| CHIKV NBC03 PR201_2250-21 2021-04 | BC3  | 2250/21 | 25.00 | PR                     | APUCARANA            | 4-2021 | F | 167809 | 63   | 16195.3 | -    | -    |
| CHIKV NBC04 PR203_2254-21 2021-04 | BC4  | 2254/21 | 28.00 | PR                     | APUCARANA            | 4-2021 | M | 237806 | 66.5 | 18348.6 | -    | -    |
| CHIKV NBC12 1510-21 PR 2021-03    | BC12 | 1510/21 | 28.00 | PR                     | APUCARANA            | 3-2021 | F | 9533   | 85.1 | 626.2   | 96.8 | 98.1 |
| CHIKV NBC13 1885-21 PR 2021-04    | BC13 | 1885/21 | 25.00 | PR                     | APUCARANA            | 4-2021 | F | 11817  | 85.6 | 846.7   | 96.9 | 98.1 |
| CHIKV NBC14 1886-21 PR 2021-04    | BC14 | 1886/21 | 27.00 | PR                     | APUCARANA            | 4-2021 | F | 16728  | 84.1 | 1088    | 96.9 | 97.9 |
| CHIKV NBC15_2094-21 PR 2021-04    | BC15 | 2094/21 | 30.00 | PR                     | APUCARANA            | 4-2021 | F | 8409   | 74.2 | 514.4   | 96.7 | 97.7 |
| CHIKV NBC16_2049-21 PR 2021-04    | BC16 | 2049/21 | 24.00 | PR                     | APUCARANA            | 4-2021 | F | 11043  | 82.5 | 755.7   | 96.9 | 98.1 |
| CHIKV NBC17 1204-21 PR 2021-03    | BC17 | 1204/21 | 25.00 | PR                     | APUCARANA            | 3-2021 | M | 10362  | 84.8 | 723.3   | 96.9 | 98.2 |
| CHIKV NBC18 1406-21 PR 2021-03    | BC18 | 1406/21 | 33.00 | PR                     | APUCARANA            | 3-2021 | F | 1854   | 55.5 | 180.8   | 96.6 | 97.5 |
| CHIKV NBC19 1290-21 PR 2021-03    | BC19 | 1290/21 | 29.00 | PR                     | APUCARANA            | 3-2021 | F | 10815  | 78.8 | 736.8   | 96.8 | 98   |
| CHIKV NBC20 1984-21 PR 2021-04    | BC20 | 1984/21 | 30.00 | PR                     | APUCARANA            | 4-2021 | F | 11587  | 81.2 | 671.2   | 96.9 | 98   |
| CHIKV NBC21 1439-21 PR 2021-03    | BC21 | 1439/21 | 29.00 | PR                     | APUCARANA            | 3-2021 | F | 21438  | 82.1 | 1377.4  | 96.9 | 98   |
| CHIKV RN ZDC-933 2022-04          | BC22 | ZDC 933 | 25.00 | RN                     | NOVA CRUZ            | 4-2022 | M | 22831  | 94   | 1903.12 | 96.6 | 98.2 |

|                           |      |          |       |    |               |        |   |       |      |        |      |      |
|---------------------------|------|----------|-------|----|---------------|--------|---|-------|------|--------|------|------|
| CHIKV RN ZDC-719 2022-03  | BC49 | ZDC 719  | 29.00 | RN | PARELHAS      | 3-2022 | M | 13726 | 93.3 | 808.5  | 96.7 | 98.2 |
| CHIKV RN ZDC-720 2022-03  | BC50 | ZDC 720  | 30.00 | RN | PARELHAS      | 3-2022 | M | 14267 | 85.7 | 886.8  | 96.5 | 98   |
| CHIKV RN ZDC-723 2022-03  | BC51 | ZDC 723  | 23.00 | RN | PARELHAS      | 3-2022 | F | 16660 | 94.4 | 1403.1 | 96.5 | 98   |
| CHIKV RN ZDC-790 2022-04  | BC52 | ZDC 790  | 22.00 | RN | POCO BRANCO   | 4-2022 | F | 75876 | 93.6 | 5957.9 | 96.7 | 98.3 |
| CHIKV RN ZDC-796 2022-03  | BC53 | ZDC 796  | 31.00 | RN | ACARI         | 3-2022 | F | 34090 | 94.4 | 2313.8 | 96.6 | 98.2 |
| CHIKV RN ZDC-798 2022-03  | BC54 | ZDC 798  | 25.00 | RN | ACARI         | 3-2022 | M | 33333 | 94.6 | 2107.7 | 96.6 | 98.2 |
| CHIKV RN ZDC-816 2022-04  | BC55 | ZDC 816  | 23.00 | RN | TIBAU DO SUL  | 4-2022 | M | 37289 | 94.4 | 2756.6 | 96.4 | 98   |
| CHIKV RN ZDC-820 2022-04  | BC56 | ZDC 820  | 23.00 | RN | JUNDIA        | 4-2022 | M | 46488 | 94.1 | 2939.4 | 96.6 | 98.2 |
| CHIKV RN ZDC-822 2022-04  | BC57 | ZDC 822  | 28.00 | RN | JUNDIA        | 4-2022 | F | 18565 | 92.2 | 1045   | 96.7 | 98.1 |
| CHIKV RN ZDC-825 2022-04  | BC58 | ZDC 825  | 25.00 | RN | SANTA CRUZ    | 4-2022 | F | 24725 | 94.5 | 1617.2 | 96.6 | 98.3 |
| CHIKV RN ZDC-826 2022-04  | BC59 | ZDC 826  | 25.00 | RN | SANTA CRUZ    | 4-2022 | M | 21229 | 93.6 | 1376.7 | 96.6 | 98.2 |
| CHIKV RN ZDC-829 2022-04  | BC60 | ZDC 829  | 23.00 | RN | MACAIBA       | 4-2022 | F | 24580 | 94.6 | 1623.6 | 96.5 | 98.2 |
| CHIKV RN ZDC-845 2022-04  | BC61 | ZDC 845  | 19.00 | RN | NOVA CRUZ     | 4-2022 | M | 23434 | 94.1 | 1731.5 | 96.6 | 98.2 |
| CHIKV RN ZDC-932 2022-04  | BC62 | ZDC 932  | 19.00 | RN | NOVA CRUZ     | 4-2022 | F | 36594 | 94.7 | 3179.1 | 96.5 | 98.1 |
| CHIKV RN ZDC-938 2022-04  | BC63 | ZDC 938  | 23.00 | RN | NOVA CRUZ     | 4-2022 | F | 30512 | 94.2 | 2046.9 | 96.6 | 98.1 |
| CHIKV RN ZDC-939 2022-04  | BC64 | ZDC 939  | 24.00 | RN | NOVA CRUZ     | 4-2022 | F | 28374 | 94.6 | 1703.3 | 96.3 | 98   |
| CHIKV RN ZDC-968 2022-04  | BC65 | ZDC 968  | 23.00 | RN | JANDAIRA      | 4-2022 | M | 32854 | 94.6 | 2161.3 | 96.6 | 98.1 |
| CHIKV RN ZDC-1035 2022-04 | BC66 | ZDC 1035 | 29.00 | RN | PARNAMIRIM    | 4-2022 | F | 19157 | 91.3 | 1155.5 | 96.4 | 98.1 |
| CHIKV RN ZDC-1038 2022-05 | BC67 | ZDC 1038 | 24.00 | RN | NATAL         | 5-2022 | F | 20378 | 93.2 | 1325.4 | 96.7 | 98.2 |
| CHIKV RN ZDC-1119 2022-04 | BC68 | ZDC 1119 | 22.00 | RN | SANTA CRUZ    | 4-2022 | M | 28747 | 94.1 | 2151.1 | 96.7 | 98.3 |
| CHIKV RN ZDC-1123 2022-05 | BC69 | ZDC 1123 | 23.00 | RN | TIBAU DO SUL  | 5-2022 | F | 36601 | 94.4 | 2324   | 96.6 | 98.2 |
| CHIKV RN ZDC-1125 2022-05 | BC70 | ZDC 1125 | 19.00 | RN | PARNAMIRIM    | 5-2022 | M | 48868 | 95   | 3424.7 | 96.5 | 98.1 |
| CHIKV RN ZDC-1170 2022-05 | BC71 | ZDC 1170 | 28.00 | RN | MACAU         | 5-2022 | F | 27905 | 94.2 | 1667.4 | 96.7 | 98.2 |
| CHIKV RN ZDC-1237 2022-05 | BC72 | ZDC 1237 | 25.00 | RN | SITIO NOVO    | 5-2022 | F | 14196 | 89.9 | 871    | 96.6 | 98.1 |
| CHIKV RN ZDC-1293 2022-05 | BC73 | ZDC 1293 | 21.00 | RN | JANDAIRA      | 5-2022 | F | 31397 | 94.7 | 1889.4 | 96.6 | 98.1 |
| CHIKV RN ZDC-1294 2022-05 | BC74 | ZDC 1294 | 17.00 | RN | JANDAIRA      | 5-2022 | M | 33118 | 94.5 | 2512.2 | 96.6 | 98.2 |
| CHIKV RN ZDC-1305 2022-05 | BC75 | ZDC 1305 | 23.00 | RN | SANTO ANTONIO | 5-2022 | M | 26277 | 93   | 1628.9 | 96.7 | 98.1 |
| CHIKV RN ZDC-1362 2022-05 | BC76 | ZDC 1362 | 27.00 | RN | MONTE ALEGRE  | 5-2022 | M | 30405 | 94.1 | 2037.6 | 96.6 | 98.2 |
| CHIKV RN ZDC-1367 2022-05 | BC77 | ZDC 1367 | 20.00 | RN | MONTE ALEGRE  | 5-2022 | F | 38156 | 92.9 | 2430.5 | 96.6 | 98.1 |
| CHIKV RN ZDC-1368 2022-05 | BC78 | ZDC 1368 | 21.00 | RN | MONTE ALEGRE  | 5-2022 | F | 34587 | 94   | 2158.8 | 96.7 | 98.3 |
| CHIKV RN ZDC-1369 2022-05 | BC79 | ZDC 1369 | 16.00 | RN | MONTE ALEGRE  | 5-2022 | F | 14418 | 94.3 | 1045.7 | 96.7 | 98.3 |
| CHIKV RN ZDC-1418 2022-05 | BC81 | ZDC 1418 | 17.00 | RN | IELMO MARINHO | 5-2022 | F | 21005 | 94   | 1303.7 | 96.6 | 98.2 |
| CHIKV RN ZDC-1485 2022-05 | BC82 | ZDC 1485 | 23.00 | RN | JOAO CAMARA   | 5-2022 | F | 31660 | 94.2 | 2081.3 | 96.6 | 98.1 |

|                           |      |              |       |    |                |         |   |        |      |        |      |      |
|---------------------------|------|--------------|-------|----|----------------|---------|---|--------|------|--------|------|------|
| CHIKV RN ZDC-1492 2022-05 | BC83 | ZDC 1492     | 21.00 | RN | JOAO CAMARA    | 5-2022  | M | 33367  | 94.1 | 2062   | 96.7 | 98.2 |
| CHIKV RN ZDC-1495 2022-05 | BC84 | ZDC 1495     | 19.00 | RN | JOAO CAMARA    | 5-2022  | M | 38372  | 94.1 | 2323.5 | 96.7 | 98.2 |
| CHIKV RN ZDC-1457 2022-05 | BC85 | ZDC 1457     | 24.00 | RN | PARNAMIRIM     | 5-2022  | F | 31129  | 94.5 | 1902.2 | 96.6 | 98.2 |
| CHIKV RN ZDC-1300 2022-05 | BC86 | ZDC 1300     | 25.00 | RN | JANDEIRA       | 5-2022  | F | 15458  | 93.6 | 937.4  | 96.8 | 98.2 |
| CHIKV RN ZDC-1505 2022-05 | BC87 | ZDC 1505     | 18.00 | RN | NATAL          | 5-2022  | M | 24821  | 92.1 | 1358.2 | 96.5 | 97.9 |
| CHIKV RN ZDC-1529 2022-05 | BC88 | ZDC 1529     | 20.00 | RN | JANDEIRA       | 5-2022  | M | 24643  | 93.7 | 1514.1 | 96.7 | 98.1 |
| CHIKV RN ZDC-1607 2022-05 | BC89 | ZDC 1607     | 21.00 | RN | SANTA MARIA    | 5-2022  | M | 24053  | 94.3 | 1466.8 | 96.7 | 98.3 |
| CHIKV RN ZDC-2129 2022-06 | BC90 | ZDC 2129     | 26.00 | RN | NATAL          | 6-2022  | F | 18897  | 92.6 | 1145.4 | 96.8 | 98.2 |
| CHIKV RN ZDC-2131 2022-06 | BC91 | ZDC 2131     | 21.00 | RN | NATAL          | 6-2022  | F | 21180  | 94.8 | 1407   | 96.5 | 98.1 |
| CHIKV RN 1945 2022-05     | NB93 | 1945 (Natal) | -     | RN | Acari          | 5-2022  | M | 40492  | 90.3 | 2465.1 | 96.5 | 98   |
| CHIKV RN 1826 2022-05     | NB94 | 1826 (Natal) | -     | RN | Nova Cruz      | 5-2022  | F | 19252  | 62.9 | 1494.8 | 95.9 | 96.9 |
| CHIKV NB45 SE-01 2021-09  | NB45 | SE-01        | 21.33 | SE | INDIAROA       | 9-2021  | F | 1880   | 93   | 128.5  | 96.9 | 98.4 |
| CHIKV NB46 SE-02 2021-09  | NB46 | SE-02        | 18.00 | SE | PORTO DA FOLHA | 9-2021  | M | 110248 | 94.3 | 8344.5 | 96.7 | 98.2 |
| CHIKV NB47 SE-03 2021-09  | NB47 | SE-03        | 18.51 | SE | PORTO DA FOLHA | 9-2021  | M | 106318 | 94.2 | 7110.1 | 96.7 | 98.2 |
| CHIKV NB48 SE-04 2021-09  | NB48 | SE-04        | 18.14 | SE | NEOPOLIS       | 9-2021  | F | 94148  | 93.6 | 7163.6 | 96.6 | 98   |
| CHIKV NB49 SE-05 2021-09  | NB49 | SE-05        | 22.00 | SE | INDIAROA       | 9-2021  | F | 118972 | 93.5 | 6326.2 | 96.7 | 98.1 |
| CHIKV NB50 SE-06 2021-09  | NB50 | SE-06        | 22.34 | SE | PORTO DA FOLHA | 9-2021  | F | 135111 | 94.5 | 8731.7 | 96.7 | 98.2 |
| CHIKV NB51 SE-07 2021-09  | NB51 | SE-07        | 19.46 | SE | LAGARTO        | 9-2021  | M | 100335 | 95   | 7164.9 | 96.4 | 98.1 |
| CHIKV NB52 SE-08 2021-09  | NB52 | SE-08        | 18.61 | SE | LAGARTO        | 9-2021  | F | 52198  | 92.6 | 3633.4 | 96.8 | 98.3 |
| CHIKV NB53 SE-09 2021-09  | NB53 | SE-09        | 22.45 | SE | LAGARTO        | 9-2021  | M | 73612  | 94   | 5180.4 | 96.7 | 98.2 |
| CHIKV NB54 SE-10 2021-09  | NB54 | SE-10        | 14.00 | SE | ARACAJU        | 9-2021  | F | 106552 | 94.8 | 9112.9 | 96.7 | 98.1 |
| CHIKV NB55 SE-11 2021-09  | NB55 | SE-11        | 23.08 | SE | SAO CRISTOVAO  | 9-2021  | M | 101483 | 93.2 | 5573   | 96.8 | 98.2 |
| CHIKV NB56 SE-12 2021-09  | NB56 | SE-12        | 21.00 | SE | PORTO DA FOLHA | 9-2021  | F | 96469  | 94.6 | 6281.7 | 96.7 | 98.2 |
| CHIKV NB57 SE-13 2021-09  | NB57 | SE-13        | 21.07 | SE | PORTO DA FOLHA | 9-2021  | F | 51279  | 94.1 | 3802.4 | 96.7 | 98.2 |
| CHIKV NB58 SE-14 2021-09  | NB58 | SE-14        | 19.00 | SE | PORTO DA FOLHA | 9-2021  | F | 98971  | 95.5 | 6908.8 | 96.3 | 98.3 |
| CHIKV NB59 SE-15 2021-09  | NB59 | SE-15        | 19.00 | SE | INDIAROA       | 9-2021  | F | 58527  | 93.9 | 4795.6 | 96.7 | 98.2 |
| CHIKV NB60 SE-16 2021-09  | NB60 | SE-16        | 20.00 | SE | NEOPOLIS       | 9-2021  | F | 49195  | 94.2 | 3461   | 96.7 | 98.3 |
| CHIKV NB61 SE-17 2021-09  | NB61 | SE-17        | 19.49 | SE | NEOPOLIS       | 9-2021  | F | 19353  | 93.3 | 1599.9 | 96.7 | 98.2 |
| CHIKV NB62 SE-18 2021-09  | NB62 | SE-18        | 21.00 | SE | PORTO DA FOLHA | 9-2021  | M | 32695  | 94.6 | 2492.5 | 96.6 | 98.1 |
| CHIKV NB63 SE-19 2021-09  | NB63 | SE-19        | 18.77 | SE | PORTO DA FOLHA | 9-2021  | F | 58053  | 94.1 | 4533.8 | 96.7 | 98.2 |
| CHIKV NB64 SE-20 2021-09  | NB64 | SE-20        | 22.26 | SE | PORTO DA FOLHA | 9-2021  | M | 63387  | 95   | 4991.5 | 96.5 | 98.2 |
| CHIKV NB65 SE-21 2021-09  | NB65 | SE-21        | 21.75 | SE | NEOPOLIS       | 9-2021  | F | 117427 | 94.8 | 7486.4 | 96.5 | 98   |
| CHIKV NB66 SE-22 2021-10  | NB66 | SE-22        | 24.63 | SE | UMBAUBA        | 10-2021 | F | 34284  | 94.5 | 2208.5 | 96.6 | 98.2 |

|                               |         |              |       |    |                         |         |   |         |      |         |      |      |
|-------------------------------|---------|--------------|-------|----|-------------------------|---------|---|---------|------|---------|------|------|
| CHIKV NB67 SE-23 2021-09      | NB67    | SE-23        | 20.21 | SE | LAGARTO                 | 9-2021  | F | 52885   | 92.3 | 3639.7  | 96.8 | 98.2 |
| CHIKV NB68 SE-24 2021-09      | NB68    | SE-24        | 22.17 | SE | LAGARTO                 | 9-2021  | M | 25638   | 94   | 1685.2  | 96.7 | 98.2 |
| CHIKV NB69 SE-25 2021-10      | NB69    | SE-25        | 17.96 | SE | NEOPOLIS                | 10-2021 | F | 65546   | 95.5 | 5133.3  | 96.3 | 98.2 |
| CHIKV NB70 SE-26 2021-10      | NB70    | SE-26        | 21.58 | SE | PORTO DA FOLHA          | 10-2021 | M | 21223   | 92.9 | 1228.6  | 96.8 | 98.1 |
| CHIKV NB71 SE-27 2021-10      | NB71    | SE-27        | 20.18 | SE | PORTO DA FOLHA          | 10-2021 | M | 2253    | 92.1 | 132.7   | 96.8 | 98.3 |
| CHIKV NB72 SE-28 2021-10      | NB72    | SE-28        | 21.58 | SE | NEOPOLIS                | 10-2021 | F | 52344   | 93.5 | 3745.6  | 96.7 | 98.2 |
| CHIKV NB73 SE-29 2021-10      | NB73    | SE-29        | 20.17 | SE | PORTO DA FOLHA          | 10-2021 | M | 61864   | 94.2 | 4416.5  | 96.7 | 98.2 |
| CHIKV NB74 SE-30 2021-09      | NB74    | SE-30        | 21.23 | SE | INDIAROBA               | 9-2021  | M | 62198   | 94.8 | 4092.9  | 96.5 | 97.9 |
| CHIKV NB75 SE-31 2021-10      | NB75    | SE-31        | 18.32 | SE | PORTO DA FOLHA          | 10-2021 | F | 100856  | 93.6 | 6944.3  | 96.6 | 98   |
| CHIKV NB76 SE-32 2021-10      | NB76    | SE-32        | 22.00 | SE | PORTO DA FOLHA          | 10-2021 | F | 44672   | 92.3 | 3317.7  | 96.7 | 98.2 |
| CHIKV NB77 SE-33 2021-10      | NB77    | SE-33        | 16.00 | SE | MONTE ALEGRE DE SERGIPE | 10-2021 | M | 77541   | 94.2 | 6055.2  | 96.7 | 98.2 |
| CHIKV NB78 SE-34 2021-10      | NB78    | SE-34        | 24.32 | SE | LAGARTO                 | 10-2021 | M | 90753   | 93.3 | 6368.9  | 96.7 | 98.2 |
| CHIKV NB79 SE-35 2021-10      | NB79    | SE-35        | 19.53 | SE | PORTO DA FOLHA          | 10-2021 | F | 45355   | 93.2 | 3198.8  | 96.7 | 98.2 |
| CHIKV NB80 SE-36 2021-10      | NB80    | SE-36        | 19.92 | SE | PORTO DA FOLHA          | 10-2021 | M | 48604   | 93.2 | 3189.4  | 96.7 | 98.3 |
| CHIKV NB81 SE-37 2021-10      | NB81    | SE-37        | 23.47 | SE | ARACAJU                 | 10-2021 | M | 2661    | 94.1 | 138     | 96.8 | 98.3 |
| CHIKV NB82 SE-38 2021-10      | NB82    | SE-38        | 14.98 | SE | MONTE ALEGRE DE SERGIPE | 10-2021 | F | 2433    | 94.3 | 119.3   | 96.8 | 98.4 |
| CHIKV NB83 SE-39 2021-10      | NB83    | SE-39        | 19.06 | SE | PORTO DA FOLHA          | 10-2021 | M | 2726    | 94.1 | 126.2   | 96.8 | 98.3 |
| CHIKV NB84 SE-40 2021-10      | NB84    | SE-40        | 22.96 | SE | PORTO DA FOLHA          | 10-2021 | M | 2893    | 92.4 | 171.6   | 96.8 | 98.3 |
| CHIKV NB85 SE-41 2021-10      | NB85    | SE-41        | 20.55 | SE | PORTO DA FOLHA          | 10-2021 | F | 2214    | 92.7 | 136.9   | 96.8 | 98.3 |
| CHIKV NB86 SE-42 2021-10      | NB86    | SE-42        | 19.40 | SE | PORTO DA FOLHA          | 10-2021 | M | 2937    | 92.9 | 158.7   | 96.8 | 98.3 |
| CHIKV NB87 SE-43 2021-10      | NB87    | SE-43        | 21.97 | SE | PORTO DA FOLHA          | 10-2021 | F | 1971    | 92.4 | 107.1   | 96.9 | 98.3 |
| CHIKV NB88 SE-44 2021-10      | NB88    | SE-44        | 32.36 | SE | SIMAO DIAS              | 10-2021 | F | 2609    | 93.9 | 148.4   | 96.8 | 98.3 |
| CHIKV MG 25-22-RED 2021-12    | UDP0318 | 25.22_RED    | 22.70 | MG | GOVERNADOR VALADARES    | 12-2021 | F | 941173  | 96   | 8767.19 | -    | -    |
| CHIKV MG 270-22-RED 2022-02   | UDP0319 | 270.22_RED   | 25.80 | MG | MONTES CLAROS           | 2-2022  | F | 835235  | 95   | 7554.2  | -    | -    |
| CHIKV MG 571-22-RED 2022-03   | UDP0320 | 571.22_RED   | 22.50 | MG | FRANCISCO SA            | 3-2022  | M | 870644  | 96   | 8020.93 | -    | -    |
| CHIKV MG 612-22-RED 2022-02   | UDP0321 | 612.22_RED   | 26.20 | MG | BELO HORIZONTE          | 2-2022  | F | 906493  | 96   | 8369.2  | -    | -    |
| CHIKV MG 726-22-RED 2022-03   | UDP0322 | 726.22_RED   | 23.40 | MG | SALINAS                 | 3-2022  | M | 364403  | 96   | 3326.73 | -    | -    |
| CHIKV MG 736-22-RED 2022-03   | UDP0323 | 736.22_RED   | 34.00 | MG | MONTE AZUL              | 3-2022  | F | 188645  | 42   | 1612.93 | -    | -    |
| CHIKV MG 1754-22-RED 2022-03  | UDP0324 | 1754.22_RED  | 24.40 | MG | ARACUAI                 | 3-2022  | F | 892530  | 96   | 8247.74 | -    | -    |
| CHIKV MG 768-22-C-RED 2022-03 | UDP0325 | 768.22_C_RED | 28.50 | MG | MONTES CLAROS           | 3-2022  | M | 1011157 | 96   | 9348.75 | -    | -    |
| CHIKV BA BC01 2022-03         | BC01    | 292346970    | 21.30 | BA | ITAJUIPE                | 3-2022  | F | 14403.0 | 94.9 | 1024.3  | 96.4 | 97.9 |
| CHIKV BA BC02 2022-03         | BC02    | 292342712    | 30.40 | BA | ITAJUIPE                | 3-2022  | F | 21384.0 | 87.5 | 1171.4  | 96.4 | 97.7 |
| CHIKV BA BC03 2022-03         | BC03    | 292342523    | 21.10 | BA | ITAJUIPE                | 3-2022  | F | 23675.0 | 94.4 | 1539.3  | 96.7 | 98.2 |

|                       |      |           |       |    |                  |        |   |         |      |        |      |      |
|-----------------------|------|-----------|-------|----|------------------|--------|---|---------|------|--------|------|------|
| CHIKV BA BC04 2022-03 | BC04 | 292347014 | 24.60 | BA | ITAJUIPE         | 3-2022 | M | 29038.0 | 94.0 | 1559.7 | 96.7 | 98.2 |
| CHIKV BA BC05 2022-03 | BC05 | 292342731 | 23.60 | BA | ITAJUIPE         | 3-2022 | F | 24475.0 | 94.4 | 1462.5 | 96.6 | 98.0 |
| CHIKV BA BC06 2022-02 | BC06 | 292318861 | 25.60 | BA | ITAJUIPE         | 2-2022 | M | 42181.0 | 94.3 | 2232.2 | 96.5 | 98.0 |
| CHIKV BA BC07 2022-03 | BC07 | 292340189 | 21.90 | BA | JUAZEIRO         | 3-2022 | M | 24179.0 | 94.1 | 1619.3 | 96.8 | 98.2 |
| CHIKV BA BC08 2022-03 | BC08 | 292309317 | 28.60 | BA | ITAPETINGA       | 3-2022 | F | 25283.0 | 87.8 | 1285.2 | 96.8 | 98.2 |
| CHIKV BA BC09 2022-03 | BC09 | 292329398 | 22.00 | BA | ITUJUTABA        | 3-2022 | M | 1735.0  | 93.1 | 112.5  | 96.8 | 98.1 |
| CHIKV BA BC10 2022-03 | BC10 | 292345418 | 24.50 | BA | JACOBINA         | 3-2022 | F | 27959.0 | 94.0 | 1740.2 | 96.7 | 98.2 |
| CHIKV BA BC11 2022-03 | BC11 | 292341930 | 21.60 | BA | MADRE DE DEUS    | 3-2022 | F | 27264.0 | 94.1 | 1919.2 | 96.7 | 98.2 |
| CHIKV BA BC12 2022-03 | BC12 | 292339837 | 23.50 | BA | UAUA             | 3-2022 | M | 31843.0 | 94.7 | 1863.1 | 96.7 | 98.2 |
| CHIKV BA BC13 2022-03 | BC13 | 292354609 | 17.90 | BA | ALMADINA         | 3-2022 | F | 26158.0 | 94.5 | 2001.9 | 96.6 | 98.1 |
| CHIKV BA BC14 2022-03 | BC14 | 292342338 | 20.30 | BA | COARACI          | 3-2022 | F | 28528.0 | 94.3 | 1834.3 | 96.6 | 98.2 |
| CHIKV BA BC15 2022-03 | BC15 | 292324218 | 16.40 | BA | COARACI          | 3-2022 | M | 17553.0 | 94.4 | 1366.6 | 96.7 | 98.2 |
| CHIKV BA BC16 2022-03 | BC16 | 292324308 | 27.30 | BA | COARACI          | 3-2022 | F | 27338.0 | 94.7 | 1537.5 | 96.4 | 98.1 |
| CHIKV BA BC17 2022-03 | BC17 | 292335413 | 28.60 | BA | FEIRA DE SANTANA | 3-2022 | F | 6640.0  | 89.0 | 353.8  | 96.6 | 97.8 |
| CHIKV BA BC18 2022-03 | BC18 | 292351417 | 26.90 | BA | ITAJUIPE         | 3-2022 | M | 16125.0 | 94.0 | 1251.3 | 96.6 | 98.2 |
| CHIKV BA BC19 2022-03 | BC19 | 292342764 | 27.90 | BA | ITAJUIPE         | 3-2022 | F | 22548.0 | 94.1 | 1109.0 | 96.7 | 98.2 |
| CHIKV BA BC20 2022-03 | BC20 | 292342653 | 27.20 | BA | ITAJUIPE         | 3-2022 | M | 29063.0 | 92.9 | 1603.0 | 96.7 | 98.1 |
| CHIKV BA BC21 2022-03 | BC21 | 292326836 | 18.90 | BA | ITAJUIPE         | 3-2022 | M | 33825.0 | 94.5 | 2267.3 | 96.6 | 98.1 |
| CHIKV BA BC22 2022-03 | BC22 | 292326999 | 22.70 | BA | ITAJUIPE         | 3-2022 | F | 33317.0 | 94.0 | 2031.0 | 96.6 | 98.1 |
| CHIKV BA BC23 2022-03 | BC23 | 292326262 | 26.90 | BA | ITAMARAJU        | 3-2022 | M | 30156.0 | 92.6 | 1658.3 | 96.7 | 98.1 |
| CHIKV BA BC24 2022-03 | BC24 | 292341330 | 26.00 | BA | ITAPITANGA       | 3-2022 | F | 33698.0 | 94.1 | 1862.7 | 96.4 | 98.1 |
| CHIKV BA BC25 2022-03 | BC25 | 292333190 | 21.80 | BA | JACOBINA         | 3-2022 | F | 8149.0  | 94.4 | 604.9  | 96.6 | 98.0 |
| CHIKV BA BC26 2022-03 | BC26 | 292329319 | 27.80 | BA | JUAZEIRO         | 3-2022 | M | 25549.0 | 94.5 | 1315.3 | 96.7 | 98.2 |
| CHIKV BA BC27 2022-05 | BC27 | 292444774 | 23.60 | BA | PARIPIRANGA      | 5-2022 | F | 20410.0 | 94.5 | 1243.8 | 96.7 | 98.1 |
| CHIKV BA BC28 2022-05 | BC28 | 292444767 | 20.10 | BA | PARIPIRANGA      | 5-2022 | M | 20000.0 | 94.1 | 1425.5 | 96.7 | 98.2 |
| CHIKV BA BC29 2022-05 | BC29 | 292442988 | 20.80 | BA | JEQUIE           | 5-2022 | F | 25754.0 | 94.3 | 1585.8 | 96.6 | 98.1 |
| CHIKV BA BC30 2022-05 | BC30 | 292452959 | 18.70 | BA | ITABUNA          | 5-2022 | F | 20391.0 | 94.1 | 1467.5 | 96.7 | 98.2 |
| CHIKV BA BC31 2022-06 | BC31 | 292456977 | 16.60 | BA | POJUCA           | 6-2022 | F | 36710.0 | 93.6 | 2164.9 | 96.7 | 98.1 |
| CHIKV BA BC32 2022-06 | BC32 | 292468683 | 19.80 | BA | CAMACARI         | 6-2022 | M | 25695.0 | 94.5 | 1683.7 | 96.7 | 98.3 |
| CHIKV BA BC33 2022-05 | BC33 | 292419147 | 20.90 | BA | ITABUNA          | 5-2022 | F | 20607.0 | 94.2 | 1346.2 | 96.6 | 98.1 |
| CHIKV BA BC34 2022-05 | BC34 | 292419397 | 17.40 | BA | ITABUNA          | 5-2022 | M | 14290.0 | 94.7 | 1098.7 | 96.6 | 98.1 |
| CHIKV BA BC35 2022-05 | BC35 | 292419463 | 21.30 | BA | ITABUNA          | 5-2022 | F | 28251.0 | 92.3 | 1661.1 | 96.7 | 98.0 |
| CHIKV BA BC36 2022-04 | BC36 | 292399973 | 22.30 | BA | ITABUNA          | 4-2022 | F | 31974.0 | 94.4 | 1927.8 | 96.4 | 97.9 |



|                          |      |           |       |    |                  |         |   |          |      |         |      |      |
|--------------------------|------|-----------|-------|----|------------------|---------|---|----------|------|---------|------|------|
| CHIKV BA BC37 2022-04    | BC37 | 292397013 | 21.00 | BA | ITAJUIPE         | 4-2022  | F | 28691.0  | 94.4 | 1825.3  | 96.6 | 98.1 |
| CHIKV BA BC38 2022-04    | BC38 | 292373156 | 21.50 | BA | ITAJUIPE         | 4-2022  | M | 30704.0  | 93.9 | 2297.8  | 96.7 | 98.2 |
| CHIKV BA BC39 2022-04    | BC39 | 292385170 | 29.90 | BA | JUAZEIRO         | 4-2022  | M | 14959.0  | 88.3 | 808.1   | 96.7 | 98.2 |
| CHIKV BA BC40 2022-04    | BC40 | 292395603 | 20.30 | BA | EUNAPOLIS        | 4-2022  | F | 24366.0  | 94.0 | 1604.8  | 96.7 | 98.2 |
| CHIKV BA BC41 2022-04    | BC41 | 292397361 | 17.80 | BA | ILHEUS           | 4-2022  | M | 16506.0  | 94.1 | 1287.3  | 96.6 | 98.2 |
| CHIKV BA BC42 2022-04    | BC42 | 292395830 | 18.70 | BA | ITABUNA          | 4-2022  | F | 18083.0  | 94.2 | 1249.9  | 96.6 | 98.2 |
| CHIKV BA BC43 2022-05    | BC43 | 292408228 | 17.50 | BA | ITABUNA          | 5-2022  | M | 20984.0  | 94.1 | 1646.4  | 96.6 | 98.2 |
| CHIKV BA BC44 2022-04    | BC44 | 292398529 | 20.70 | BA | MADRE DE DEUS    | 4-2022  | M | 22470.0  | 94.6 | 1469.8  | 96.7 | 98.2 |
| CHIKV BA BC45 2022-04    | BC45 | 292378738 | 23.20 | BA | MORRO DO CHAPEU  | 4-2022  | M | 28955.0  | 93.5 | 1730.6  | 96.7 | 98.1 |
| CHIKV BA BC46 2022-04    | BC46 | 292397438 | 21.20 | BA | SERRA            | 4-2022  | M | 23831.0  | 94.4 | 1500.1  | 96.6 | 98.1 |
| CHIKV BA BC47 2022-04    | BC47 | 292370309 | 19.80 | BA | CAMPO FORMOSO    | 4-2022  | M | 23126.0  | 94.3 | 1597.5  | 96.7 | 98.2 |
| CHIKV BA BC48 2022-03    | BC48 | 292316064 | 35.90 | BA | ITAMARAJU        | 3-2022  | F | 23841.0  | 78.7 | 1476.4  | 96.4 | 98.0 |
| CHIKV BA BC94 2022-03    | BC94 | 292350702 | 23.60 | BA | PORTO SEGURO     | 3-2022  | F | 25149.0  | 91.6 | 1256.5  | 96.7 | 98.2 |
| CHIKV BA FS0030 2015-07  | NB35 | FS0030    | 26.00 | BA | Feira de Santana | 7-2015  | F | 12212.0  | 73.8 | 780.6   | 96.4 | 97.8 |
| CHIKV BA FS0032 2015-07  | NB36 | FS0032    | 27.00 | BA | Feira de Santana | 7-2015  | F | 25812.0  | 77.6 | 1401.0  | 96.8 | 98.1 |
| CHIKV BA FS0035 2015-07  | NB37 | FS0035    | 23.00 | BA | Feira de Santana | 7-2015  | M | 23109.0  | 90.6 | 1099.6  | 96.8 | 98.2 |
| CHIKV BA FS0047 2015-07  | NB38 | FS0047    | 28.00 | BA | Feira de Santana | 7-2015  | F | 14481.0  | 73.8 | 889.1   | 96.8 | 98.0 |
| CHIKV BA FS0048 2015-07  | NB39 | FS0048    | 30.00 | BA | Feira de Santana | 7-2015  | M | 8604.0   | 59.1 | 621.6   | 96.8 | 97.7 |
| CHIKV BA FS0055 2015-07  | NB40 | FS0055    | 25.00 | BA | Feira de Santana | 7-2015  | M | 18706.0  | 87.9 | 941.5   | 96.9 | 98.4 |
| CHIKV BA FS0066 2015-07  | NB41 | FS0066    | 22.00 | BA | Feira de Santana | 7-2015  | F | 16922.0  | 92.9 | 983.1   | 96.9 | 98.4 |
| CHIKV BA FS0089 2015-07  | NB42 | FS0089    | 30.00 | BA | Feira de Santana | 7-2015  | F | 13283.0  | 69.0 | 812.2   | 96.9 | 98.1 |
| CHIKV BA FS0106 2015-07  | NB43 | FS0106    | 30.00 | BA | Feira de Santana | 7-2015  | F | 15356.0  | 65.3 | 988.5   | 96.8 | 97.9 |
| CHIKV BA FS0116 2015-07  | NB44 | FS0116    | 30.00 | BA | Feira de Santana | 7-2015  | F | 3426.0   | 31.8 | 455.9   | 96.8 | 97.7 |
| CHIKV BA FS0124 2015-07  | NB45 | FS0124    | 30.00 | BA | Feira de Santana | 7-2015  | F | 14783.0  | 69.6 | 974.9   | 96.6 | 97.6 |
| CHIKV BA FS0129 2015-07  | NB46 | FS0129    | 26.00 | BA | Feira de Santana | 7-2015  | M | 17350.0  | 76.1 | 1095.5  | 97.0 | 98.3 |
| CHIKV BA FS0132 2015-07  | NB47 | FS0132    | 30.00 | BA | Feira de Santana | 7-2015  | F | 5605.0   | 50.1 | 482.5   | 96.4 | 97.3 |
| CHIKV BA FS0014A 2015-08 | NB48 | FS0014A   | 30.00 | BA | Feira de Santana | 8-2015  | F | 10910.0  | 62.1 | 763.4   | 96.3 | 97.3 |
| CHIKV BA DFS1686 2019-10 | NB04 | DFS- 1686 | 22.57 | BA | Feira de Santana | 10-2019 | M | 314126.0 | 89.3 | 16143.3 | 96.6 | 97.9 |
| CHIKV BA DFS1786 2019-11 | NB05 | DFS- 1786 | 30.60 | BA | Feira de Santana | 11-2019 | M | 219074.0 | 75.8 | 12052.6 | 96.4 | 97.5 |
| CHIKV BA DFS1808 2019-11 | NB06 | DFS- 1808 | 28.60 | BA | Feira de Santana | 11-2019 | M | 326059.0 | 87.6 | 17001.9 | 96.5 | 97.9 |
| CHIKV BA DFS1837 2019-11 | NB07 | DFS- 1837 | 21.72 | BA | Feira de Santana | 11-2019 | F | 207689.0 | 92.0 | 9717.2  | 96.7 | 98.1 |
| CHIKV BA DFS1849 2019-11 | NB08 | DFS- 1849 | 29.54 | BA | Feira de Santana | 11-2019 | F | 253914.0 | 87.1 | 12450.4 | 96.6 | 98.0 |
| CHIKV BA DFS1854 2019-11 | NB09 | DFS- 1854 | 35.25 | BA | Feira de Santana | 11-2019 | F | 262770.0 | 75.5 | 14107.5 | 96.6 | 97.6 |

|                          |      |           |       |    |                  |         |   |          |      |         |      |      |
|--------------------------|------|-----------|-------|----|------------------|---------|---|----------|------|---------|------|------|
| CHIKV/BA/DFS1856/2019-11 | NB10 | DFS- 1856 | 31.54 | BA | Feira de Santana | 11-2019 | F | 207524.0 | 82.7 | 10561.8 | 96.6 | 98.1 |
|--------------------------|------|-----------|-------|----|------------------|---------|---|----------|------|---------|------|------|

NT: Nucleotide  
AA: Amino Aci

**Table S2. Centrality Metrics employed to measure transmission networks generated by the StrainHub tool.**

| Metastates | Degree Centrality | Indegree Centrality | Outdegree Centrality | Betweenness Centrality | Closeness Centrality | Source Hub Ratio |
|------------|-------------------|---------------------|----------------------|------------------------|----------------------|------------------|
| Paraguay   | 1                 | 1                   | 0                    | 0                      | 0.07                 | 0.00             |
| Southeast  | 5                 | 2                   | 3                    | 6                      | 0.11                 | 0.60             |
| Northeast  | 6                 | 2                   | 4                    | 9                      | 0.13                 | 0.67             |
| Haiti      | 1                 | 1                   | 0                    | 0                      | 0.08                 | 0.00             |
| Midwest    | 4                 | 2                   | 2                    | 3                      | 0.11                 | 0.50             |
| North      | 2                 | 1                   | 1                    | 0                      | 0.08                 | 0.50             |
| South      | 1                 | 1                   | 0                    | 0                      | 0.07                 | 0.00             |

**Table S3. Detailed site-by-site results from the BUSTED analysis for the envelope gene of clade I and II.**

| Codon           | ER ( $\omega > 1$ ) <sup>1</sup> | LogL    | Epost[ $\alpha$ ] <sup>2</sup> | LR <sup>3</sup> |
|-----------------|----------------------------------|---------|--------------------------------|-----------------|
| <b>Clade I</b>  |                                  |         |                                |                 |
| 187             | 187,712.29                       | -78.412 | 0.294                          | 12.721          |
| 372             | 742.301                          | -31.012 | 1.07                           | 6.651           |
| 699             | 344.611                          | -92.661 | 0.294                          | 3.369           |
| 60              | 211.964                          | -79.268 | 0.294                          | 2.566           |
| 62              | 57.168                           | -17.817 | 3.408                          | 4.991           |
| <b>Clade II</b> |                                  |         |                                |                 |
| 187             | 213,975.17                       | -78.617 | 36.082                         | 10.86           |
| 186             | 92,991.85                        | -62.607 | 36.082                         | 7.669           |
| 371             | 726.104                          | -17.444 | 2.287                          | 6.078           |
| 121             | 499.333                          | -15.376 | 0.6                            | 7.502           |

|     |         |         |        |       |
|-----|---------|---------|--------|-------|
| 184 | 105.634 | -59.121 | 35.724 | 0.507 |
| 29  | 96.931  | -36.048 | 33.526 | 4.941 |
| 60  | 19.358  | -78.757 | 36.082 | 1.279 |
| 370 | 12.692  | -42.632 | 36.074 | 1.966 |

<sup>1</sup>Evidence ratio for positive selection.

<sup>2</sup>Posterior mean of the synonymous rate,  $\alpha$ .

<sup>3</sup>Site log-likelihood ratio contribution.

**Table S4. Sites under positive diversifying selection identified by HYPHY-MEME in the envelope gene of the clades I and II.**

| Site            | alpha | beta+   | LRT   | p-value |
|-----------------|-------|---------|-------|---------|
| <b>Clade I</b>  |       |         |       |         |
| 33              | 0     | 5.58    | 4.31  | 0.05    |
| 60              | 3.62  | 364.35  | 7.88  | 0.01    |
| 62              | 0     | 284.76  | 8.45  | 0.01    |
| 138             | 0     | 5.28    | 4.11  | 0.06    |
| 184             | 0     | 58.06   | 7.23  | 0.01    |
| 187             | 1.09  | 1521.76 | 21.03 | 0       |
| 282             | 0     | 2.31    | 3.43  | 0.09    |
| 372             | 0     | 6084.51 | 18.38 | 0       |
| 441             | 0     | 5.35    | 6.41  | 0.02    |
| 539             | 0     | 9.23    | 4.23  | 0.06    |
| 695             | 0     | 556.34  | 9.8   | 0       |
| 699             | 0     | 131.88  | 11.93 | 0       |
| <b>Clade II</b> |       |         |       |         |
| 29              | 0     | 315.97  | 9.55  | 0       |
| 53              | 0     | 3.7     | 3.71  | 0.07    |
| 60              | 4.18  | 469.33  | 4.83  | 0.04    |
| 121             | 0     | 181.66  | 8.77  | 0.01    |

---

|     |     |         |       |      |
|-----|-----|---------|-------|------|
| 138 | 0   | 4.53    | 3.31  | 0.09 |
| 184 | 0   | 133.16  | 8.43  | 0.01 |
| 186 | 4.7 | 988.28  | 12.58 | 0    |
| 187 | 2.1 | 1124.28 | 20.44 | 0    |
| 371 | 0   | 256.38  | 9.31  | 0    |
| 432 | 0   | 4.87    | 3.88  | 0.07 |
| 441 | 0   | 3.16    | 3.38  | 0.09 |
| 539 | 0   | 70.36   | 4.82  | 0.04 |
| 699 | 0   | 9.05    | 3.67  | 0.08 |

---

alpha: synonymous substitution rate at a site.

beta+: non-synonymous substitution rate at a site for the positive selection category.

LRT: likelihood ratio test statistic for episodic diversification.
